# Supplementary material for: High content screening and proteomic analysis identify a kinase inhibitor that rescues pathological phenotypes in a patient-derived model of Parkinson’s disease
Source: PubMed Central journal article supplement (PMC8837749; doi:10.1038/s41531-022-00278-y), 2022-02-11
Supplement: 41531_2022_278_MOESM1_ESM.pdf [file 41531_2022_278_MOESM1_ESM.pdf]

a

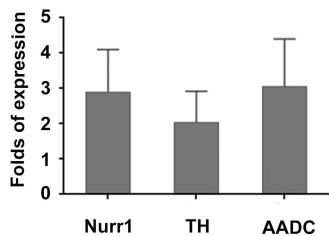

b

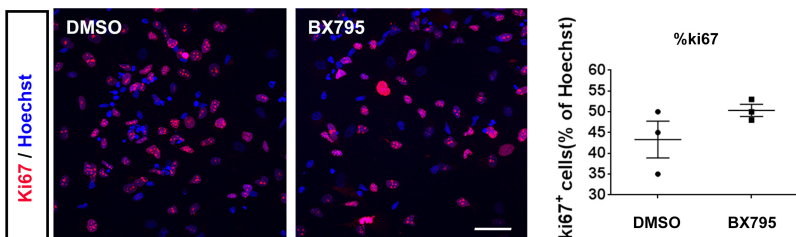

c

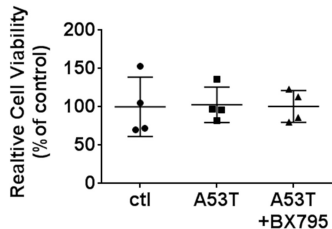

### Supplementary Figure 1. Expression of dopaminergic markers in patient p.A53T-iPSC-derived neurons

a. RT-qPCR analysis of selected dopaminergic markers in p.A53T iPSC-derived neurons at 21 DIV: Tyrosine Hydroxylase (TH), Nuclear receptor related 1 protein (Nurr1) and Aromatic Laminic acid decarboxylase (AADC) normalized to GAPDH levels. Data represent mean ± SEM (n = 3). Student's t-test was used.

b. Representative images of p.A53T iPSC-derived neurons at 21 DIV immunostained for Ki67 (red) to label cycling cells. Hoechst+ nuclei are in blue (Scale bar, 50 μm).

c. Quantification of the percentage of Ki67+ cells in the presence or absence of BX795. Data represent mean ± SEM (n = 3). Student's t-test was used.

c. Quantification of total nuclei count. Data represent mean ± SEM (n = 4). Comparisons by ANOVA with Tukey correction.

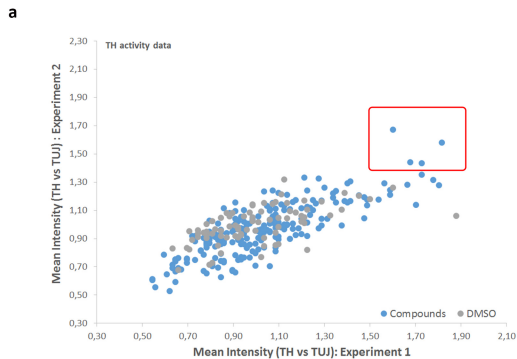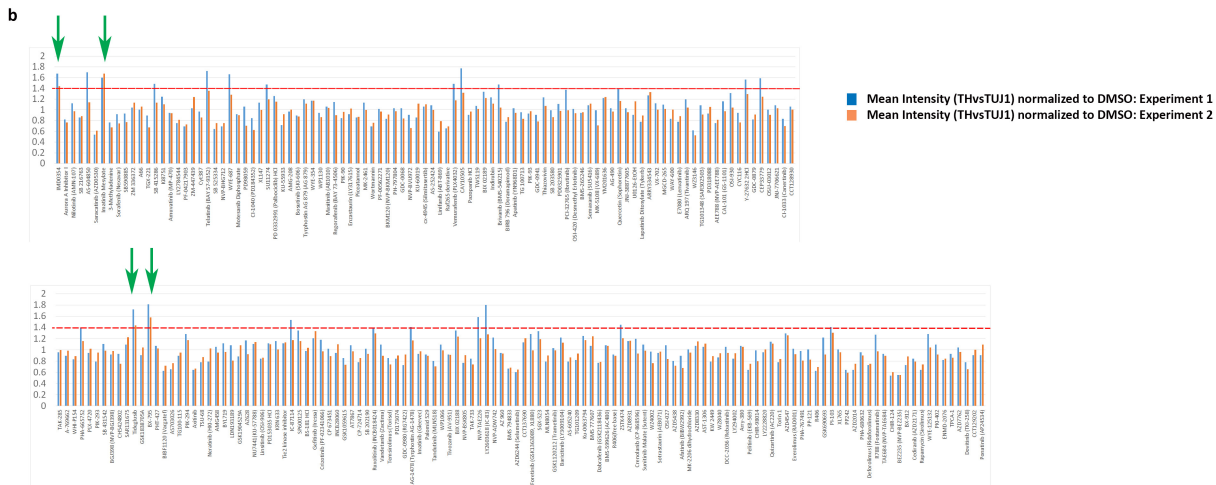

### Supplementary Figure 2. High-Content Screening Analysis

a. Scatter plot showing the ratio of TH versus TUJ1 fluorescence intensity in duplicate upon treatment with the small molecule kinase inhibitors (blue dots). The dots inside the rectangle correspond to the 4 hit compounds showing significant increase of TH versus TUJ1 fluorescence ratio as compared to the DMSO controls (grey dots). The toxic compounds have been excluded.

b. Bar graph showing the ratio of TH versus TUJ1 fluorescence intensity that has been normalized to DMSO control for each compound screened. Each color represents one experiment. Horizontal red line is set at two standard deviations and the green arrows show the 4 hit compounds. The toxic compounds have been excluded.

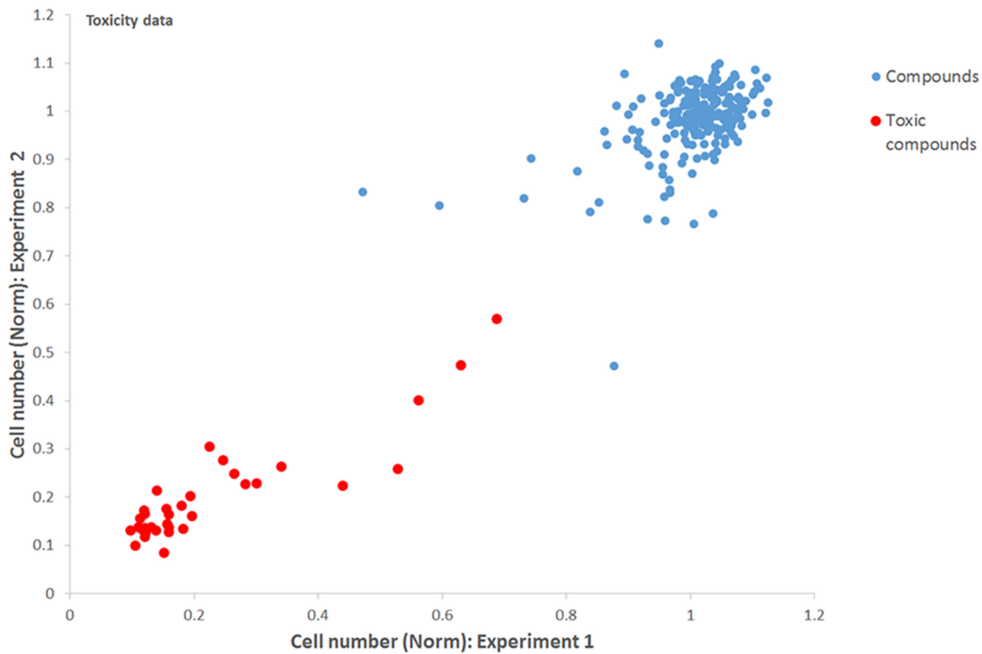

**Supplementary Figure 3. Identification of toxic compounds in the small molecule library of kinase inhibitors**

Summary of total nuclei counts from two screening plates. Compounds in cells with low nuclei counts were considered toxic and were excluded from the analysis. Each assay plate was normalized to DMSO.

a

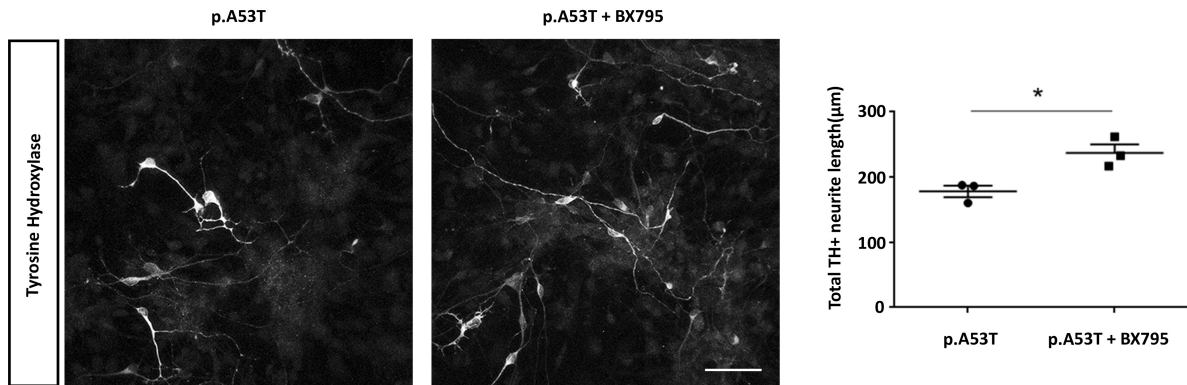

b

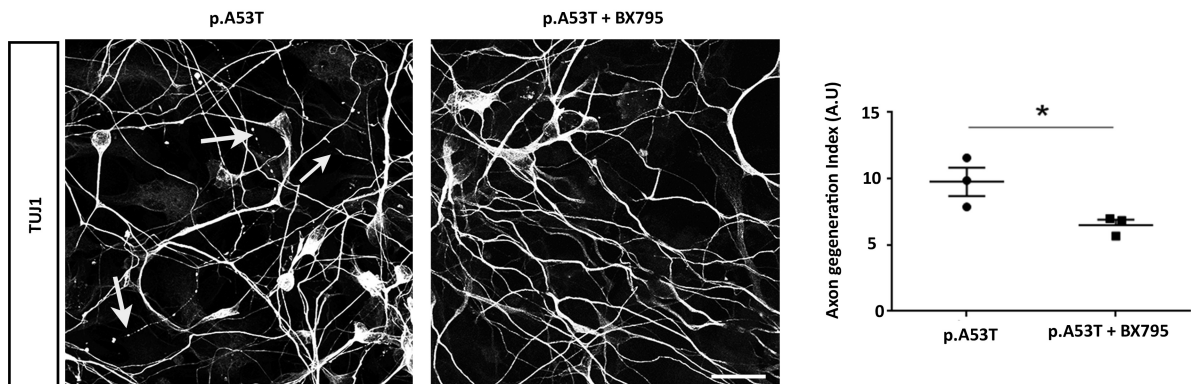

#### Supplementary Figure 4. Rescue of neuropathological features by BX795 in p.A53T neurons from a second patient

a. BX795 has a positive effect on neurite length of p.A53T-neurons. Representative confocal images of p.A53T-neurons immunostained for TH and quantification of total neurite length of TH+ cells. Data represent mean  $\pm$  SEM. Student's t-test was used. Scale bar, 50 $\mu$ m.

b. BX795 alleviates axonal neuropathology in p.A53T-neurons as demonstrated by immunostaining for  $\beta$ III-tubulin (TUJ1; confocal images). Neurites with swollen varicosities or fragmented processes are indicated with arrows. Scale bar, 30 $\mu$ m. Axonal degeneration is estimated in the accompanying graph by measuring the ratio of TUJ1+ spots over the total TUJ1+ area in untreated (DMSO) or BX795-treated p.A53T-neurons. Data represent mean  $\pm$  SEM. Student's t-test was used.



a

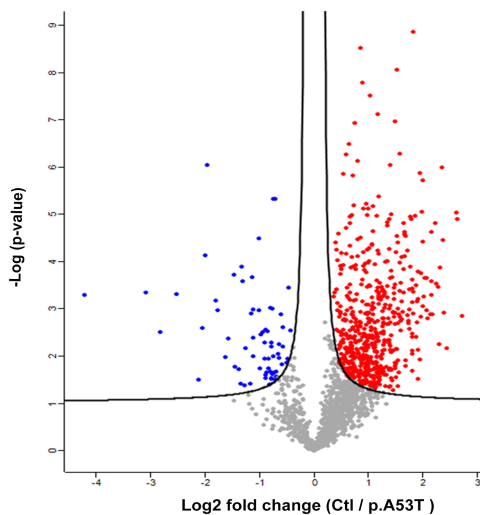

b

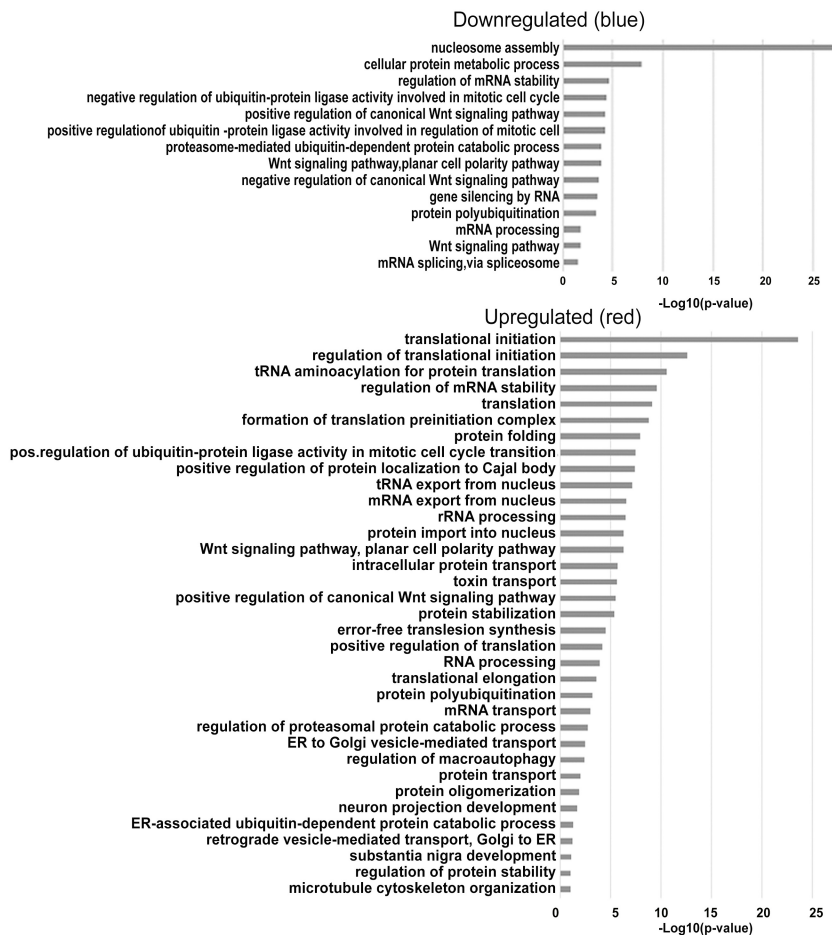

### Supplementary Figure 5. Identification of the biological processes that are dysregulated in p.A53T neurons

a. Volcano plot of differentially expressed proteins between control and p.A53T-neurons assessed by quantitative proteomics analysis. Each point represents the difference in expression (fold-change) between the two groups plotted against the level of statistical significance. Blue dots correspond to proteins downregulated in p.A53T neurons while red dots show proteins upregulated in p.A53T neurons (FDR=0.05,  $S_0 = 0.1$ , as indicated by black lines).

b. GO enrichment analysis for biological processes of the differentially expressed proteins was performed using DAVID software ( $p < 0.05$ ).

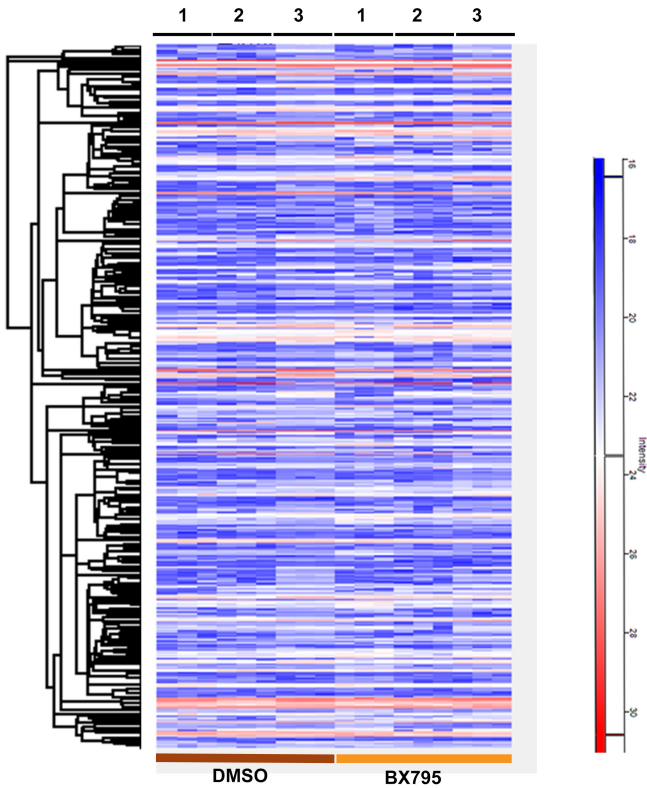

**Supplementary Figure 6. Hierarchical clustering of proteins in ctrl (WT) cells treated with BX795**

Hierarchical clustering shows that there is no change in the proteome of ctrl-neurons upon treatment with BX795 (one-way ANOVA analysis). Columns in the different groups (control and ctrl-neurons treated with BX795) correspond to individual samples tested and rows represent single proteins (blue, low expression; red, high expression; data are from 3 independent experiments).

Figure 2d

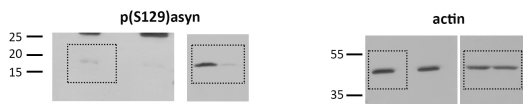

Figure 7a

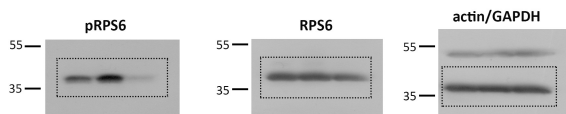

Figure 8b

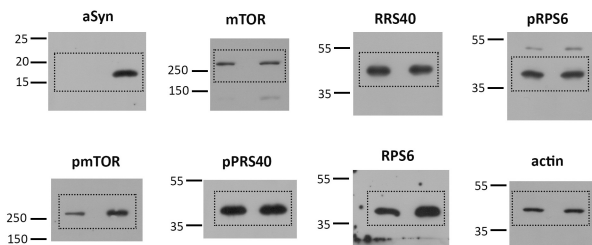

Figure 8c

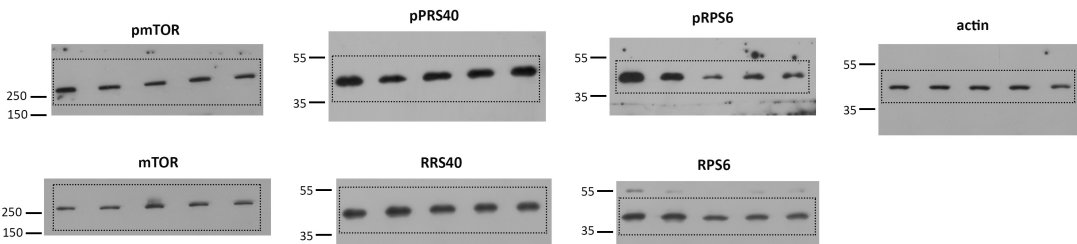

Figure 8e

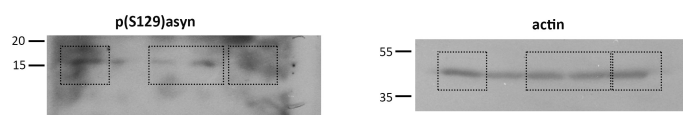

Figure 9b

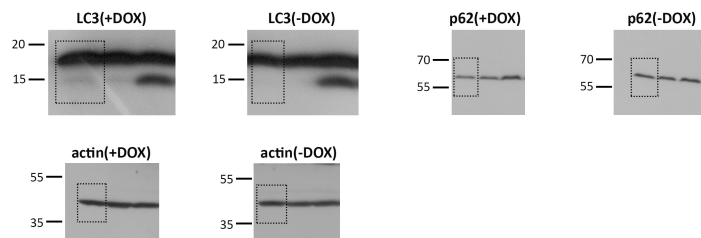

Figure 9e

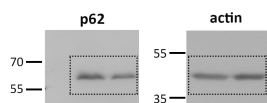

**Supplementary Table 1. Kinase Inhibitor Library (Selleck Chemicals) and targets**

| <b>Item Name</b>              | <b>Target</b>            |
|-------------------------------|--------------------------|
| Linifanib (ABT-869)           | PDGFR, VEGFR             |
| Axitinib                      | VEGFR, PDGFR, c-Kit      |
| Saracatinib (AZD0530)         | Src, Bcr-Abl             |
| AZD6244 (Selumetinib)         | MEK                      |
| BEZ235 (NVP-BEZ235)           | mTOR, PI3K               |
| BIBF1120 (Vargatef)           | VEGFR, PDGFR, FGFR       |
| Afatinib (BIBW2992)           | EGFR, HER2               |
| Bosutinib (SKI-606)           | Src                      |
| Cediranib (AZD2171)           | VEGFR, Flt               |
| CI-1033 (Canertinib)          | EGFR, HER2               |
| CI-1040 (PD184352)            | MEK                      |
| Dasatinib (BMS-354825)        | Src, Bcr-Abl, c-Kit      |
| Deforolimus (Ridaforolimus)   | mTOR                     |
| Gefitinib (Iressa)            | EGFR                     |
| Imatinib Mesylate             | PDGFR, c-Kit, Bcr-Abl    |
| Lapatinib Ditosylate (Tykerb) | EGFR, HER2               |
| Motesanib Diphosphate         | VEGFR, PDGFR, c-Kit      |
| Nilotinib (AMN-107)           | Bcr-Abl                  |
| Pazopanib HCl                 | VEGFR, PDGFR, c-Kit      |
| PD0325901                     | MEK                      |
| PI-103                        | DNA-PK, PI3K, mTOR       |
| Rapamycin (Sirolimus)         | mTOR                     |
| Sorafenib (Nexavar)           | VEGFR, PDGFR, Raf        |
| Sunitinib Malate (Sutent)     | VEGFR, PDGFR, c-Kit, Flt |
| Tandutinib (MLN518)           | Flt                      |
| Temsirolimus (Torisel)        | mTOR                     |
| Vandetanib (Zactima)          | VEGFR                    |
| VX-680 (MK-0457, Tozasertib)  | Aurora Kinase            |
| Enzastaurin (LY317615)        | PKC                      |
| BMS-599626 (AC480)            | EGFR, HER2               |
| Masitinib (AB1010)            | c-Kit, PDGFR, FGFR, FAK  |
| GDC-0941                      | PI3K                     |
| SB 431542                     | TGF-beta/Smad            |
| Crizotinib (PF-02341066)      | c-Met, ALK               |
| ZSTK474                       | PI3K                     |
| SB 216763                     | GSK-3                    |
| SB 203580                     | p38 MAPK                 |
| SB 202190                     | p38 MAPK                 |
| MK-2206 dihydrochloride       | Akt                      |
| PD153035 HCl                  | EGFR                     |
| SU11274                       | c-Met                    |
| NVP-ADW742                    | IGF-1R                   |
| KU-55933                      | ATM                      |
| PF-04217903                   | c-Met                    |
| U0126-EtOH                    | MEK                      |
| ZM-447439                     | Aurora Kinase            |
| GDC-0879                      | Raf                      |
| LY294002                      | PI3K                     |

|                               |                                          |
|-------------------------------|------------------------------------------|
| Danuseritib (PHA-739358)      | Aurora Kinase, FGFR, Bcr-Abl, c-RET, Src |
| TAE684 (NVP-TAE684)           | ALK                                      |
| BI 2536                       | PLK                                      |
| Foretinib (GSK1363089, XL880) | c-Met, VEGFR                             |
| SGX-523                       | c-Met                                    |
| JNJ-38877605                  | c-Met                                    |
| PD 0332991 (Palbociclib) HCl  | CDK                                      |
| XL147                         | PI3K                                     |
| Everolimus (RAD001)           | mTOR                                     |
| MLN8237 (Alisertib)           | Aurora Kinase                            |
| AT9283                        | Bcr-Abl, JAK, Aurora Kinase              |
| AG-490                        | JAK, EGFR                                |
| SNS-032 (BMS-387032)          | CDK                                      |
| Barasertib (AZD1152-HQPA)     | Aurora Kinase                            |
| PLX-4720                      | Raf                                      |
| SNS-314                       | Aurora Kinase                            |
| CP-724714                     | EGFR, HER2                               |
| TGX-221                       | PI3K                                     |
| WZ3146                        | EGFR                                     |
| CYC116                        | Aurora Kinase, VEGFR                     |
| WZ4002                        | EGFR                                     |
| PD98059                       | MEK                                      |
| Regorafenib (BAY 73-4506)     | c-Kit, Raf, VEGFR                        |
| WZ8040                        | EGFR                                     |
| ENMD-2076                     | Flt, Aurora Kinase, VEGFR                |
| PIK-90                        | PI3K                                     |
| Tivozanib (AV-951)            | VEGFR, c-Kit, PDGFR                      |
| OSI-930                       | c-Kit, VEGFR                             |
| Ku-0063794                    | mTOR                                     |
| Amuvatinib (MP-470)           | c-Met, c-Kit, PDGFR, Flt, c-RET          |
| JNJ-7706621                   | CDK, Aurora Kinase                       |
| WYE-354                       | mTOR                                     |
| IC-87114                      | Others                                   |
| TG100-115                     | PI3K                                     |
| GSK1059615                    | PI3K, mTOR                               |
| MGCD-265                      | c-Met, VEGFR, Tie-2                      |
| Rigosertib (ON-01910)         | PLK                                      |
| Ki8751                        | VEGFR, c-Kit, PDGFR                      |
| Pelitinib (EKB-569)           | EGFR                                     |
| AS-605240                     | PI3K                                     |
| Aurora A Inhibitor I          | Aurora Kinase                            |
| PHA-680632                    | Aurora Kinase                            |
| SP600125                      | JNK                                      |
| TSU-68                        | VEGFR, PDGFR, FGFR                       |
| AS703026                      | MEK                                      |
| SB 525334                     | TGF-beta/Smad                            |
| HMN-214                       | PLK                                      |
| AEE788 (NVP-AEE788)           | EGFR, Flt, VEGFR, HER2                   |
| PHA-793887                    | CDK                                      |
| PIK-93                        | PI3K, VEGFR                              |

|                               |                                  |
|-------------------------------|----------------------------------|
| Ponatinib (AP24534)           | Bcr-Abl, VEGFR, FGFR, PDGFR, Flt |
| LY2228820                     | p38 MAPK                         |
| CCT129202                     | Aurora Kinase                    |
| XL765                         | PI3K, mTOR                       |
| AT7519                        | CDK                              |
| Quizartinib (AC220)           | Flt                              |
| Hesperadin                    | Aurora Kinase                    |
| BIX 02188                     | MEK                              |
| BIX 02189                     | MEK                              |
| AZD7762                       | Chk                              |
| R406(free base)               | Syk                              |
| AZD8055                       | mTOR                             |
| KRN 633                       | VEGFR, PDGFR                     |
| AT7867                        | Akt, S6 kinase                   |
| BMS 777607                    | c-Met                            |
| PD318088                      | MEK                              |
| KU-60019                      | ATM                              |
| BS-181 HCl                    | CDK                              |
| BIRB 796 (Doramapimod)        | p38 MAPK                         |
| NVP-BSK805                    | JAK                              |
| DCC-2036 (Rebastinib)         | Bcr-Abl                          |
| AZD8330                       | MEK                              |
| Neratinib (HKI-272)           | HER2, EGFR                       |
| KW 2449                       | Flt, Bcr-Abl, Aurora Kinase      |
| LY2784544                     | JAK                              |
| AZD8931                       | EGFR, HER2                       |
| GSK461364                     | PLK                              |
| R406                          | Syk, Flt                         |
| Raf265 derivative             | VEGFR, Raf                       |
| BMS 794833                    | c-Met, VEGFR                     |
| NVP-BHG712                    | VEGFR, Src, Raf, Bcr-Abl         |
| OSI-420 (Desmethyl Erlotinib) | EGFR                             |
| PIK-293                       | PI3K                             |
| AZ 960                        | JAK                              |
| Mubritinib (TAK 165)          | HER2                             |
| PP242                         | mTOR                             |
| Cyt387                        | JAK                              |
| Indirubin                     | GSK-3                            |
| Quercetin (Sophoretin)        | PI3K, PKC, Src, Sirtuin          |
| Imatinib (Gleevec)            |                                  |
| GSK2126458                    | PI3K, mTOR                       |
| VX-702                        | p38 MAPK                         |
| CAL-101 (GS-1101)             | PI3K                             |
| BI6727 (Volasertib)           | PLK                              |
| PIK-294                       | PI3K                             |
| Telatinib (BAY 57-9352)       | VEGFR, PDGFR, c-Kit              |
| AZD5438                       | CDK                              |
| OSI-027                       | mTOR                             |
| PP-121                        | DNA-PK, mTOR, PDGF               |
| WP1130                        | DUB, Bcr-Abl                     |

|                            |                                |
|----------------------------|--------------------------------|
| BKM120 (NVP-BKM120)        | PI3K                           |
| cx-4945 (Silmilasertib)    | PKC                            |
| LDN193189                  | TGF-beta/Smad                  |
| PF-05212384 (PKI-587)      | mTOR, PI3K                     |
| TAK-733                    | MEK                            |
| CCT128930                  | Akt                            |
| A66                        | PI3K                           |
| A-674563                   | Akt, CDK, PKA                  |
| AS-252424                  | PI3K                           |
| AS-604850                  | PI3K                           |
| PF-00562271                | FAK                            |
| WAY-600                    | mTOR                           |
| WYE-125132                 | mTOR                           |
| WYE-687                    | mTOR                           |
| Apatinib (YN968D1)         | VEGFR                          |
| LY2603618 (IC-83)          | Chk                            |
| GSK1120212 (Trametinib)    | MEK                            |
| A-769662                   | AMPK                           |
| KX2-391                    | Src                            |
| PCI-32765 (Ibrutinib)      | Src                            |
| TAK-901                    | Aurora Kinase                  |
| TG101209                   | Flt, JAK, c-RET                |
| AMG 900                    | Aurora Kinase                  |
| GSK1838705A                | IGF-1, ALK                     |
| ZM 336372                  | Raf                            |
| GDC-0980 (RG7422)          | mTOR, PI3K                     |
| NU7441(KU-57788)           | DNA-PK, PI3K                   |
| Flavopiridol hydrochloride | CDK                            |
| PH-797804                  | p38 MAPK                       |
| Crenolanib (CP-868596)     | PDGFR                          |
| PF-04691502                | mTOR, PI3K, Akt                |
| Dovitinib (TKI-258)        | c-Kit, FGFR, Flt, VEGFR, PDGFR |
| Y-27632 2HCl               | ROCK                           |
| Brivanib (BMS-540215)      | VEGFR, FGFR                    |
| GSK1904529A                | IGF-1R                         |
| MLN8054                    | Aurora Kinase                  |
| OSU-03012                  | PDK-1                          |
| PD173074                   | FGFR, VEGFR                    |
| Vemurafenib (PLX4032)      | Raf                            |
| AMG-208                    | c-Met                          |
| Thiazovivin                | ROCK                           |
| Palomid 529                | mTOR                           |
| PHT-427                    | Akt, PDK-1                     |
| Tie2 kinase inhibitor      | Tie-2                          |
| Baricitinib (LY3009104)    | JAK                            |
| E7080 (Lenvatinib)         | VEGFR                          |
| BGJ398 (NVP-BGJ398)        | FGFR                           |
| SB590885                   | Raf                            |
| R788 (Fostamatinib)        | Syk                            |
| CAY10505                   | PI3K                           |

|                              |                    |
|------------------------------|--------------------|
| CHIR-124                     | Chk                |
| Linsitinib (OSI-906)         | IGF-1R             |
| GSK690693                    | Akt                |
| Ruxolitinib (INCB018424)     | JAK                |
| PHA-665752                   | c-Met              |
| GSK1070916                   | Aurora Kinase      |
| PKI-402                      | PI3K               |
| TG101348 (SAR302503)         | JAK                |
| PF-03814735                  | Aurora Kinase, FAK |
| SB 415286                    | GSK-3              |
| INK 128                      | mTOR               |
| Dinaciclib (SCH727965)       | CDK                |
| MK-5108 (VX-689)             | Aurora Kinase      |
| AG-1478 (Tyrphostin AG-1478) | EGFR               |
| AMG458                       | c-Met              |
| Arry-380                     | HER2, EGFR         |
| PHA-848125                   | CDK                |
| AZ628                        | Raf                |
| CCT137690                    | Aurora Kinase      |
| CHIR-98014                   | GSK-3              |
| NVP-BGT226                   | PI3K, mTOR         |
| YM201636                     | PI3K               |
| 3-Methyladenine              | PI3K               |
| BX-795                       | PDK-1, IKK         |
| BX-912                       | PDK-1              |
| CH5424802                    | ALK                |
| NVP-BVU972                   | c-Met              |
| AST-1306                     | EGFR               |
| BMS-265246                   | CDK                |
| MK-2461                      | c-Met, FGFR, PDGFR |
| AZD2014                      | mTOR               |
| TAK-285                      | EGFR, HER2         |
| INCB28060                    | c-Met              |
| WP1066                       | JAK                |
| Piceatannol                  | Others             |
| Sotrastaurin (AEB071)        | PKC                |
| AZD4547                      | FGFR               |
| GDC-0068                     | Akt                |
| Dabrafenib (GSK2118436)      | Raf                |
| Tyrphostin AG 879 (AG 879)   | HER2               |
| Torin 2                      | mTOR               |
| BYL719                       | PI3K               |
| CEP33779                     | JAK                |
| NVP-TAE226                   | FAK                |
| CP 673451                    | Others             |
| PHA-767491                   | CDK                |
| Torin 1                      | mTOR               |
| TPCA-1                       | IKK                |
| Wortmannin                   | PI3K               |
| Staurosporine                | PKC                |



|                      |           |
|----------------------|-----------|
| ARRY334543           | EGFR      |
| Tideglusib           | GSK-3     |
| Semaxanib (SU5416)   | VEGFR     |
| SAR131675            | VEGFR     |
| IMD0354              | IKK       |
| TG 100713            | PI3K      |
| WHI-P154             | JAK, EGFR |
| ARQ 197 (Tivantinib) | c-Met     |
| TWS119               | GSK-3     |

**Supplementary Table 2. Differentially expressed proteins between pA53T and control neurons**

| Protein names                                                                                                                                                                                                                                                                                                                                            | Gene names           | Difference  | Upregulated | Downregulated |
|----------------------------------------------------------------------------------------------------------------------------------------------------------------------------------------------------------------------------------------------------------------------------------------------------------------------------------------------------------|----------------------|-------------|-------------|---------------|
| Prothymosin alpha;Prothymosin alpha, N-terminally processed;Thymosin alpha-1                                                                                                                                                                                                                                                                             | PTMA                 | -4,22058974 |             | +             |
| Protein transport protein Sec61 subunit alpha isoform 1                                                                                                                                                                                                                                                                                                  | SEC61A1              | -3,09643152 |             | +             |
| Histone H3.3;Histone H3.2;Histone H3.1t;Histone H3.1                                                                                                                                                                                                                                                                                                     | H3f3a;H3F3A;HIST2H3A | -2,83120812 |             | +             |
| Fibronectin;Anastellin;Ugl-Y1;Ugl-Y2;Ugl-Y3                                                                                                                                                                                                                                                                                                              | FN1                  | -2,52735837 |             | +             |
| 60S ribosomal protein L31                                                                                                                                                                                                                                                                                                                                | RPL31                | -2,12383503 |             | +             |
| Glial fibrillary acidic protein                                                                                                                                                                                                                                                                                                                          | GFAP                 | -2,05050193 |             | +             |
| Golgi-associated plant pathogenesis-related protein 1                                                                                                                                                                                                                                                                                                    | GLIPR2               | -1,997111   |             | +             |
| Histone H1.4                                                                                                                                                                                                                                                                                                                                             | HIST1H1E             | -1,96522289 |             | +             |
| Transgelin                                                                                                                                                                                                                                                                                                                                               | TAGLN                | -1,80209096 |             | +             |
| Radixin                                                                                                                                                                                                                                                                                                                                                  | RDX                  | -1,77318255 |             | +             |
| Collagen alpha-1(I) chain                                                                                                                                                                                                                                                                                                                                | COL1A1               | -1,63404274 |             | +             |
| Ubiquitin-conjugating enzyme E2 variant 2                                                                                                                                                                                                                                                                                                                | UBE2V2               | -1,57051065 |             | +             |
| Histone H2A type 2-C;Histone H2A type 2-A                                                                                                                                                                                                                                                                                                                | Hist2h2ac;HIST2H2AC  | -1,46609285 |             | +             |
| MARCKS-related protein                                                                                                                                                                                                                                                                                                                                   | MARCKSL1             | -1,45300293 |             | +             |
| Chromobox protein homolog 1                                                                                                                                                                                                                                                                                                                              | CBX1                 | -1,35597377 |             | +             |
| Histone H2B type 1-L;Histone H2B type 1-M;Histone H2B type 1-N;Histone H2B type 1-H;Histone H2B type 1-P;Histone H2B type 1-K;Histone H2B type 1-C/E/G;Histone H2B type 2-B;Histone H2B type 1-B;Histone H2B type 2-F;Histone H2B type 1-C/E/F/G/I;Histone H2B type 1-D;Histone H2B type 1-F/J/L;Histone H2B type F-S;Histone H2B 3;Histone H2B type 1-A | HIST1H2BL;HIST1H2B   | -1,32357407 |             | +             |
| Histone H1.5                                                                                                                                                                                                                                                                                                                                             | HIST1H1B             | -1,32074398 |             | +             |

|                                                                         |                     |             |  |   |
|-------------------------------------------------------------------------|---------------------|-------------|--|---|
| TAR DNA-binding protein 43                                              | TARDBP              | -1,28565174 |  | + |
| Neutral amino acid transporter A                                        | SLC1A4              | -1,26124043 |  | + |
| Clathrin light chain A                                                  | CLTA                | -1,16397328 |  | + |
| Cytoplasmic dynein 1 intermediate chain 2                               | DYNC1I2;Dync1i2     | -1,15378104 |  | + |
| CDKN2A-interacting protein                                              | CDKN2AIP            | -1,13875198 |  | + |
| Tropomyosin alpha-4 chain                                               | TPM4                | -1,1163631  |  | + |
| Tropomyosin alpha-1 chain                                               | TPM1                | -1,11481222 |  | + |
| Soluble lamin-associated protein of 75 kDa                              | FAM169A             | -1,11439917 |  | + |
| Ribosome-binding protein 1                                              | RRBP1               | -1,01449564 |  | + |
| Histone H1.2;Histone H1.3                                               | HIST1H1C;Hist1h1d;H | -1,00663524 |  | + |
| Zinc finger RNA-binding protein                                         | ZFR                 | -1,00062116 |  | + |
| Cellular retinoic acid-binding protein 1                                | CRABP1              | -0,97820261 |  | + |
| 45 kDa calcium-binding protein                                          | SDF4                | -0,93680615 |  | + |
| Eukaryotic translation initiation factor 4 gamma 3                      | EIF4G3              | -0,91687775 |  | + |
| Protein phosphatase 1B                                                  | PPM1B               | -0,90773561 |  | + |
| Caldesmon                                                               | CALD1               | -0,89930958 |  | + |
| Proteasome subunit alpha type-3                                         | PSMA3               | -0,89364327 |  | + |
| Tubulin beta chain                                                      | TUBB                | -0,89241261 |  | + |
| Protein canopy homolog 2                                                | CNPY2               | -0,86795319 |  | + |
| Nuclear pore complex protein Nup153                                     | NUP153              | -0,85966153 |  | + |
| Transmembrane emp24 domain-containing protein 10                        | TMED10;Tmed10       | -0,84096781 |  | + |
| Rho GTPase-activating protein 21                                        | ARHGAP21            | -0,83467611 |  | + |
| Brain acid soluble protein 1                                            | BASP1               | -0,82571665 |  | + |
| Heterochromatin protein 1-binding protein 3                             | HP1BP3              | -0,81141747 |  | + |
| Peroxiredoxin-2                                                         | PRDX2               | -0,80545298 |  | + |
| Plasma membrane calcium-transporting ATPase 1                           | ATP2B1              | -0,78781933 |  | + |
| Band 4.1-like protein 3;Band 4.1-like protein 3, N-terminally processed | EPB41L3             | -0,78772333 |  | + |

|                                                                                                                                                                                                                                                                     |                    |             |  |   |
|---------------------------------------------------------------------------------------------------------------------------------------------------------------------------------------------------------------------------------------------------------------------|--------------------|-------------|--|---|
| Actin, alpha cardiac muscle 1;Actin, alpha skeletal muscle                                                                                                                                                                                                          | ACTC1;ACTA1        | -0,77967135 |  | + |
| Polypyrimidine tract-binding protein 2                                                                                                                                                                                                                              | PTBP2;Ptbp2        | -0,77931235 |  | + |
| Putative phospholipase B-like 2;Putative phospholipase B-like 2 32 kDa form;Putative phospholipase B-like 2 45 kDa form                                                                                                                                             | PLBD2              | -0,76606115 |  | + |
| Heterogeneous nuclear ribonucleoprotein A1;Heterogeneous nuclear ribonucleoprotein A1, N-terminally processed;Heterogeneous nuclear ribonucleoprotein A1-like 2                                                                                                     | HNRNPA1;HNRNPA1L   | -0,76263936 |  | + |
| Acyl-CoA dehydrogenase family member 9, mitochondrial                                                                                                                                                                                                               | ACAD9              | -0,7569809  |  | + |
| Kinectin                                                                                                                                                                                                                                                            | KTN1               | -0,74694803 |  | + |
| UBX domain-containing protein 1                                                                                                                                                                                                                                     | UBXN1              | -0,72750621 |  | + |
| ATP synthase subunit d, mitochondrial                                                                                                                                                                                                                               | ATP5H              | -0,72205056 |  | + |
| Reticulon-4                                                                                                                                                                                                                                                         | RTN4               | -0,71967845 |  | + |
| Amyloid beta A4 protein;N-APP;Soluble APP-alpha;Soluble APP-beta;C99;Beta-amyloid protein 42;Beta-amyloid protein 40;C83;P3(42);P3(40);C80;Gamma-secretase C-terminal fragment 59;Gamma-secretase C-terminal fragment 57;Gamma-secretase C-terminal fragment 50;C31 | APP;App            | -0,70541975 |  | + |
| Formin-binding protein 1-like                                                                                                                                                                                                                                       | FNBP1L             | -0,69941372 |  | + |
| Ubiquitin-40S ribosomal protein S27a;Ubiquitin;40S ribosomal protein S27a;Ubiquitin-60S ribosomal protein L40;Ubiquitin;60S ribosomal protein L40;Polyubiquitin-B;Ubiquitin;Polyubiquitin-C;Ubiquitin;Polyubiquitin-A;Ubiquitin;Ubiquitin-related                   | RPS27A;Rps27a;UBA5 | -0,66847505 |  | + |

|                                                                          |                   |             |   |   |
|--------------------------------------------------------------------------|-------------------|-------------|---|---|
| Prelamin-A/C;Lamin-A/C                                                   | LMNA              | -0,66254658 |   | + |
| N(G),N(G)-dimethylarginine dimethylaminohydrolase 2                      | DDAH2             | -0,64632734 |   | + |
| U4/U6.U5 tri-snRNP-associated protein 1                                  | SART1;Sart1       | -0,63747215 |   | + |
| Splicing factor, proline- and glutamine-rich                             | SFPQ              | -0,61198764 |   | + |
| Delta-1-pyrroline-5-carboxylate dehydrogenase, mitochondrial             | ALDH4A1           | -0,58621025 |   | + |
| Pre-mRNA-processing factor 40 homolog A                                  | PRPF40A           | -0,57962841 |   | + |
| Zyxin                                                                    | ZYX               | -0,56851408 |   | + |
| Histone H4                                                               | Hist1h4a;HIST1H4A | -0,49797291 |   | + |
| Catenin delta-1                                                          | CTNND1            | -0,48542023 |   | + |
| Lamin-B1                                                                 | LMNB1             | -0,47633659 |   | + |
| Reticulocalbin-1                                                         | RCN1              | -0,44097794 |   | + |
| Polyadenylate-binding protein 1                                          | PABPC1            | 0,36678696  | + |   |
| T-complex protein 1 subunit eta                                          | CCT7              | 0,37164391  | + |   |
| ELAV-like protein 1                                                      | ELAVL1            | 0,38943545  | + |   |
| Nitric oxide synthase-interacting protein                                | NOSIP             | 0,40467771  | + |   |
| Lamina-associated polypeptide 2, isoform alpha;Thymopoinetin;Thymopentin | TMPO              | 0,41073651  | + |   |
| Chromobox protein homolog 5                                              | CBX5;Cbx5         | 0,41383574  | + |   |
| Elongation factor 2                                                      | EEF2;Eef2         | 0,42066256  | + |   |
| 60S ribosomal protein L4                                                 | RPL4              | 0,4245472   | + |   |
| Cell cycle and apoptosis regulator protein 2                             | CCAR2             | 0,43223847  | + |   |
| Pre-mRNA-splicing factor ATP-dependent RNA helicase DHX15                | DHX15             | 0,44824028  | + |   |
| Ubiquitin thioesterase OTUB1                                             | OTUB1             | 0,44847086  | + |   |
| Myosin-10                                                                | MYH10             | 0,44919946  | + |   |
| Platelet-activating factor acetylhydrolase IB subunit alpha              | PAFAH1B1;Pafah1b1 | 0,46440866  | + |   |
| MICOS complex subunit MIC60                                              | IMMT              | 0,47223282  | + |   |
| General transcription factor II-I                                        | GTF2I;Gtf2i       | 0,47717624  | + |   |

|                                                                                                                                |        |            |   |  |
|--------------------------------------------------------------------------------------------------------------------------------|--------|------------|---|--|
| Voltage-dependent anion-selective channel protein 2                                                                            | VDAC2  | 0,47729916 | + |  |
| DNA topoisomerase 1                                                                                                            | TOP1   | 0,47934278 | + |  |
| 60 kDa heat shock protein, mitochondrial                                                                                       | HSPD1  | 0,48447143 | + |  |
| Far upstream element-binding protein 2                                                                                         | KHSRP  | 0,48472828 | + |  |
| Stress-70 protein, mitochondrial                                                                                               | HSPA9  | 0,48504872 | + |  |
| Dynamamin-2                                                                                                                    | DNM2   | 0,48548105 | + |  |
| Hydroxymethylglutaryl-CoA synthase, cytoplasmic                                                                                | HMGCS1 | 0,48664877 | + |  |
| Sarcoplasmic/endoplasmic reticulum calcium ATPase 2                                                                            | ATP2A2 | 0,49363581 | + |  |
| Multifunctional protein ADE2;Phosphoribosylaminoimidazole-succinocarboxamide synthase;Phosphoribosylaminoimidazole carboxylase | PAICS  | 0,49574788 | + |  |
| Bifunctional purine biosynthesis protein PURH;Phosphoribosylaminoimidazolecarboxamide formyltransferase;IMP cyclohydrolase     | ATIC   | 0,49794049 | + |  |
| Isocitrate dehydrogenase [NADP], mitochondrial                                                                                 | IDH2   | 0,49905989 | + |  |
| Adenosylhomocysteinase                                                                                                         | AHCY   | 0,50178507 | + |  |
| Methionine--tRNA ligase, cytoplasmic                                                                                           | MARS   | 0,50235918 | + |  |
| Eukaryotic initiation factor 4A-III;Eukaryotic initiation factor 4A-III, N-terminally processed                                | EIF4A3 | 0,50351991 | + |  |
| Coatomer subunit alpha;Xenin;Proxenin                                                                                          | COPA   | 0,50397809 | + |  |
| Rab GDP dissociation inhibitor beta                                                                                            | GDI2   | 0,5050727  | + |  |
| Oxysterol-binding protein 1                                                                                                    | OSBP   | 0,50976329 | + |  |
| Ras-related protein Rab-2A                                                                                                     | RAB2A  | 0,51790598 | + |  |
| NADPH--cytochrome P450 reductase                                                                                               | POR    | 0,52251604 | + |  |
| Aspartate aminotransferase, mitochondrial                                                                                      | GOT2   | 0,52831353 | + |  |

|                                                                                         |               |            |   |  |
|-----------------------------------------------------------------------------------------|---------------|------------|---|--|
| Eukaryotic translation initiation factor 3 subunit E                                    | EIF3E         | 0,53256332 | + |  |
| 40S ribosomal protein SA                                                                | Rpsa;RPSA     | 0,53590287 | + |  |
| Stress-induced-phosphoprotein 1                                                         | STIP1         | 0,53696569 | + |  |
| Serine-threonine kinase receptor-associated protein                                     | STRAP         | 0,53877873 | + |  |
| 2,4-dienoyl-CoA reductase, mitochondrial                                                | DECR1         | 0,54022598 | + |  |
| Malate dehydrogenase, mitochondrial                                                     | MDH2          | 0,54088974 | + |  |
| Malectin                                                                                | MLEC          | 0,54325846 | + |  |
| Coatomer subunit beta                                                                   | COPB2         | 0,54395019 | + |  |
| Septin-9                                                                                | SEPT9         | 0,54734124 | + |  |
| CTP synthase 1                                                                          | CTPS1         | 0,55151049 | + |  |
| Signal transducer and activator of transcription 3                                      | STAT3         | 0,55413225 | + |  |
| Cysteine protease ATG4B                                                                 | ATG4B;Atg4b   | 0,55785137 | + |  |
| Flap endonuclease 1                                                                     | FEN1          | 0,56196107 | + |  |
| ATP-dependent RNA helicase DDX19A;ATP-dependent RNA helicase DDX19B                     | DDX19A;DDX19B | 0,56328519 | + |  |
| Nuclear pore membrane glycoprotein 210                                                  | NUP210        | 0,56637213 | + |  |
| Heat shock 70 kDa protein 4                                                             | HSPA4         | 0,566942   | + |  |
| Phosphoserine aminotransferase                                                          | PSAT1         | 0,57374679 | + |  |
| Pyruvate dehydrogenase E1 component subunit beta, mitochondrial                         | PDHB          | 0,57605701 | + |  |
| Transitional endoplasmic reticulum ATPase                                               | Vcp;VCP       | 0,58135562 | + |  |
| Arginine--tRNA ligase, cytoplasmic                                                      | RARS          | 0,58195093 | + |  |
| X-ray repair cross-complementing protein 6                                              | XRCC6         | 0,58255429 | + |  |
| Bifunctional glutamate/proline--tRNA ligase;Glutamate--tRNA ligase;Proline--tRNA ligase | EPRS          | 0,58510844 | + |  |
| Peroxisredoxin-6                                                                        | PRDX6         | 0,58962144 | + |  |

|                                                                                                                                           |                |            |   |  |
|-------------------------------------------------------------------------------------------------------------------------------------------|----------------|------------|---|--|
| CAD protein;Glutamine-dependent carbamoyl-phosphate synthase;Aspartate carbamoyltransferase;Dihydroorotase                                | CAD            | 0,59100299 | + |  |
| Farnesyl pyrophosphate synthase                                                                                                           | FDPS           | 0,59512181 | + |  |
| Cyclin-dependent-like kinase 5                                                                                                            | CDK5           | 0,60137918 | + |  |
| Ran GTPase-activating protein 1                                                                                                           | RANGAP1        | 0,60225423 | + |  |
| Heterogeneous nuclear ribonucleoprotein D-like                                                                                            | HNRNPDL        | 0,60320918 | + |  |
| NEDD8-activating enzyme E1 catalytic subunit                                                                                              | UBA3           | 0,60380046 | + |  |
| T-complex protein 1 subunit beta                                                                                                          | CCT2           | 0,60664368 | + |  |
| Cytoskeleton-associated protein 5                                                                                                         | CKAP5          | 0,60961533 | + |  |
| Prohibitin                                                                                                                                | PHB            | 0,61144045 | + |  |
| Unconventional myosin-VI                                                                                                                  | MYO6           | 0,61296166 | + |  |
| Cleavage stimulation factor subunit 3                                                                                                     | CSTF3          | 0,61377652 | + |  |
| Importin-5                                                                                                                                | IPO5           | 0,61648496 | + |  |
| Very-long-chain (3R)-3-hydroxyacyl-CoA dehydratase 3                                                                                      | HACD3          | 0,61995697 | + |  |
| Glycine--tRNA ligase                                                                                                                      | GARS           | 0,62528377 | + |  |
| Thioredoxin-like protein 1                                                                                                                | TXNL1          | 0,62663396 | + |  |
| Isoleucine--tRNA ligase, cytoplasmic                                                                                                      | IARS           | 0,62683529 | + |  |
| Pyruvate carboxylase, mitochondrial                                                                                                       | PC             | 0,63483853 | + |  |
| T-complex protein 1 subunit gamma                                                                                                         | CCT3           | 0,6354794  | + |  |
| 40S ribosomal protein S10;Putative 40S ribosomal protein S10-like                                                                         | RPS10;RPS10P5  | 0,63819567 | + |  |
| 182 kDa tankyrase-1-binding protein                                                                                                       | TNKS1BP1       | 0,64544317 | + |  |
| ATP-citrate synthase                                                                                                                      | ACLY;Acly      | 0,64815733 | + |  |
| Inositol-3-phosphate synthase 1                                                                                                           | ISYNA1         | 0,65151003 | + |  |
| Guanine nucleotide-binding protein subunit beta-2-like 1;Guanine nucleotide-binding protein subunit beta-2-like 1, N-terminally processed | GNB2L1         | 0,6532597  | + |  |
| Probable ATP-dependent RNA helicase DDX6;ATP-dependent RNA helicase ddx6                                                                  | DDX6;Ddx6;ddx6 | 0,65331353 | + |  |



|                                                                               |                 |            |   |  |
|-------------------------------------------------------------------------------|-----------------|------------|---|--|
| Gem-associated protein 5                                                      | GEMIN5          | 0,65372573 | + |  |
| Mitochondrial-processing peptidase subunit alpha                              | PMPCA           | 0,65491528 | + |  |
| ATP-dependent RNA helicase DDX1                                               | DDX1            | 0,65614933 | + |  |
| Neurofilament light polypeptide                                               | NEFL            | 0,65656302 | + |  |
| 40S ribosomal protein S6                                                      | RPS6            | 0,65667152 | + |  |
| Methylmalonate-semialdehyde dehydrogenase [acylating], mitochondrial          | ALDH6A1         | 0,65771061 | + |  |
| Heterogeneous nuclear ribonucleoprotein L                                     | HNRNPL          | 0,65942128 | + |  |
| Exportin-1                                                                    | XPO1;Xpo1       | 0,66231028 | + |  |
| T-complex protein 1 subunit theta                                             | CCT8            | 0,66265233 | + |  |
| Heterogeneous nuclear ribonucleoprotein M                                     | HNRNPM          | 0,66267946 | + |  |
| T-complex protein 1 subunit epsilon                                           | CCT5            | 0,66413583 | + |  |
| Lysine--tRNA ligase                                                           | KARS            | 0,66436916 | + |  |
| Carboxymethylenebutenolidase homolog                                          | CMBL            | 0,66666497 | + |  |
| Uncharacterized protein C7orf50                                               | C7orf50         | 0,66734335 | + |  |
| Neurofilament medium polypeptide                                              | NEFM            | 0,6674739  | + |  |
| Dynamin-1-like protein                                                        | DNM1L           | 0,66997189 | + |  |
| Nuclear pore complex protein Nup50                                            | NUP50           | 0,67132717 | + |  |
| Peroxiredoxin-1                                                               | PRDX1           | 0,67464023 | + |  |
| Ubiquitin carboxyl-terminal hydrolase 5                                       | USP5            | 0,67514716 | + |  |
| Chloride intracellular channel protein 1                                      | CLIC1           | 0,67566193 | + |  |
| T-complex protein 1 subunit delta                                             | CCT4            | 0,6770969  | + |  |
| Elongation factor 1-beta                                                      | EEF1B2          | 0,67718993 | + |  |
| AP-2 complex subunit alpha-2                                                  | AP2A2           | 0,68129052 | + |  |
| Septin-2                                                                      | SEPT2           | 0,68638208 | + |  |
| High mobility group protein B1;Putative high mobility group protein B1-like 1 | HMGB1;Hmgb1;HMG | 0,6891399  | + |  |
| Replication factor C subunit 1                                                | RFC1            | 0,69490157 | + |  |
| MICOS complex subunit MIC19                                                   | CHCHD3          | 0,69938045 | + |  |
| Alpha-internexin                                                              | INA             | 0,7001809  | + |  |

|                                                                                                                                                                                                                                 |             |            |   |  |
|---------------------------------------------------------------------------------------------------------------------------------------------------------------------------------------------------------------------------------|-------------|------------|---|--|
| RNA polymerase II-associated factor 1 homolog                                                                                                                                                                                   | PAF1        | 0,70027139 | + |  |
| 60S ribosomal protein L5                                                                                                                                                                                                        | RPL5        | 0,7005859  | + |  |
| Sideroflexin-1                                                                                                                                                                                                                  | SFXN1       | 0,701732   | + |  |
| Poly(rC)-binding protein 2                                                                                                                                                                                                      | PCBP2       | 0,70254792 | + |  |
| Protein crumbs homolog 2                                                                                                                                                                                                        | CRB2        | 0,70587688 | + |  |
| 39S ribosomal protein L22, mitochondrial                                                                                                                                                                                        | MRPL22      | 0,70988634 | + |  |
| Cytoskeleton-associated protein 4                                                                                                                                                                                               | CKAP4       | 0,70989778 | + |  |
| Tumor protein D54                                                                                                                                                                                                               | TPD52L2     | 0,71015655 | + |  |
| Metastasis-associated protein MTA2                                                                                                                                                                                              | MTA2;Mta2   | 0,71304385 | + |  |
| mRNA cap guanine-N7 methyltransferase                                                                                                                                                                                           | RNMT        | 0,71329859 | + |  |
| Ubiquitin carboxyl-terminal hydrolase isozyme L1                                                                                                                                                                                | UCHL1       | 0,71483188 | + |  |
| Cytochrome b-c1 complex subunit 2, mitochondrial                                                                                                                                                                                | UQCRC2      | 0,715438   | + |  |
| YLP motif-containing protein 1                                                                                                                                                                                                  | YLPM1       | 0,71668392 | + |  |
| ATP-dependent DNA helicase Q1                                                                                                                                                                                                   | RECQL       | 0,71730084 | + |  |
| Vacuolar protein sorting-associated protein 35                                                                                                                                                                                  | VPS35;Vps35 | 0,71786329 | + |  |
| Chromobox protein homolog 3                                                                                                                                                                                                     | CBX3        | 0,71830495 | + |  |
| 60S ribosomal protein L12                                                                                                                                                                                                       | RPL12       | 0,72048357 | + |  |
| Sodium/potassium-transporting ATPase subunit beta-1                                                                                                                                                                             | ATP1B1      | 0,72105302 | + |  |
| Protein LSM14 homolog B                                                                                                                                                                                                         | LSM14B      | 0,72187487 | + |  |
| C-1-tetrahydrofolate synthase, cytoplasmic;Methylenetetrahydrofolate dehydrogenase;Methenyltetrahydrofolate cyclohydrolase;Formyltetrahydrofolate synthetase;C-1-tetrahydrofolate synthase, cytoplasmic, N-terminally processed | MTHFD1      | 0,72321616 | + |  |
| 40S ribosomal protein S25                                                                                                                                                                                                       | RPS25       | 0,72731739 | + |  |
| FACT complex subunit SSRP1                                                                                                                                                                                                      | SSRP1       | 0,72842047 | + |  |
| Huntingtin-interacting protein 1                                                                                                                                                                                                | HIP1        | 0,72859001 | + |  |

|                                                         |               |            |   |  |
|---------------------------------------------------------|---------------|------------|---|--|
| Pyrroline-5-carboxylate reductase 1, mitochondrial      | PYCR1         | 0,72987959 | + |  |
| Pre-mRNA-processing-splicing factor 8                   | PRPF8         | 0,7321896  | + |  |
| HBS1-like protein                                       | HBS1L         | 0,73350504 | + |  |
| Adenylosuccinate synthetase isozyme 2                   | ADSS          | 0,73512416 | + |  |
| Protein arginine N-methyltransferase 1                  | PRMT1         | 0,7378042  | + |  |
| Alanine--tRNA ligase, cytoplasmic                       | AARS          | 0,73953523 | + |  |
| O-acetyl-ADP-ribose deacetylase 1                       | OARD1         | 0,74088754 | + |  |
| SUMO-activating enzyme subunit 2                        | UBA2          | 0,74310282 | + |  |
| Nuclear pore complex protein Nup205                     | NUP205        | 0,74427859 | + |  |
| Ataxin-10                                               | ATXN10        | 0,75490401 | + |  |
| Glutathione peroxidase 1                                | GPX1          | 0,75532087 | + |  |
| Calcyclin-binding protein                               | CACYBP        | 0,75540161 | + |  |
| F-actin-capping protein subunit beta                    | CAPZB         | 0,75865576 | + |  |
| Alpha-aminoadipic semialdehyde dehydrogenase            | ALDH7A1       | 0,76025094 | + |  |
| Calcium-binding mitochondrial carrier protein Aralar1   | SLC25A12      | 0,76159901 | + |  |
| Aconitate hydratase, mitochondrial                      | ACO2          | 0,76345507 | + |  |
| Sorting nexin-6;Sorting nexin-6, N-terminally processed | SNX6          | 0,76497332 | + |  |
| Heat shock 70 kDa protein 12A                           | HSPA12A       | 0,76612684 | + |  |
| Basic leucine zipper and W2 domain-containing protein 1 | BZW1          | 0,77025922 | + |  |
| Enhancer of mRNA-decapping protein 4                    | EDC4          | 0,78210153 | + |  |
| Nuclear protein localization protein 4 homolog          | NPLOC4        | 0,78391669 | + |  |
| Tyrosine-protein kinase CSK                             | CSK           | 0,78742769 | + |  |
| Translation initiation factor eIF-2B subunit delta      | EIF2B4        | 0,78922335 | + |  |
| E3 ubiquitin-protein ligase UHRF1                       | UHRF1         | 0,78940964 | + |  |
| 60S ribosomal protein L27a                              | RPL27A;Rpl27a | 0,79095183 | + |  |
| 26S proteasome non-ATPase regulatory subunit 4          | PSMD4         | 0,79130618 | + |  |

|                                                                                                                                                                                    |              |            |   |  |
|------------------------------------------------------------------------------------------------------------------------------------------------------------------------------------|--------------|------------|---|--|
| FACT complex subunit SPT16                                                                                                                                                         | SUPT16H      | 0,79339176 | + |  |
| Trifunctional purine biosynthetic protein adenosine-3;Phosphoribosylamine--glycine ligase;Phosphoribosylformylglycinamide cyclo-ligase;Phosphoribosylglycinamide formyltransferase | GART         | 0,79848162 | + |  |
| Eukaryotic translation initiation factor 4 gamma 2                                                                                                                                 | EIF4G2       | 0,80582746 | + |  |
| E2/E3 hybrid ubiquitin-protein ligase UBE2O                                                                                                                                        | UBE2O        | 0,80629285 | + |  |
| Eukaryotic translation initiation factor 3 subunit C;Eukaryotic translation initiation factor 3 subunit C-like protein                                                             | EIF3C;EIF3CL | 0,80635749 | + |  |
| DNA ligase 3                                                                                                                                                                       | LIG3         | 0,80947198 | + |  |
| ATP-binding cassette sub-family F member 1                                                                                                                                         | ABCF1        | 0,81026226 | + |  |
| Nuclear pore complex protein Nup88                                                                                                                                                 | NUP88        | 0,8166737  | + |  |
| Adipocyte plasma membrane-associated protein                                                                                                                                       | APMAP        | 0,81971105 | + |  |
| Cysteine and glycine-rich protein 1                                                                                                                                                | CSRP1        | 0,8229582  | + |  |
| Nucleoporin p54                                                                                                                                                                    | NUP54        | 0,82570903 | + |  |
| ATP-dependent 6-phosphofructokinase, muscle type                                                                                                                                   | PFKM         | 0,83510272 | + |  |
| Protein kinase C and casein kinase substrate in neurons protein 2                                                                                                                  | PACSIN2      | 0,83510399 | + |  |
| DNA repair protein XRCC1                                                                                                                                                           | XRCC1        | 0,83597565 | + |  |
| Succinate-semialdehyde dehydrogenase, mitochondrial                                                                                                                                | ALDH5A1      | 0,83830134 | + |  |
| Aflatoxin B1 aldehyde reductase member 2                                                                                                                                           | AKR7A2       | 0,8383984  | + |  |
| E3 ubiquitin-protein ligase BRE1A                                                                                                                                                  | RNF20        | 0,83881548 | + |  |
| PHD finger protein 6                                                                                                                                                               | PHF6         | 0,8417937  | + |  |
| 28S ribosomal protein S31, mitochondrial                                                                                                                                           | MRPS31       | 0,8446863  | + |  |

|                                                                                                                                                                                                                                                                                                                                 |                       |            |   |  |
|---------------------------------------------------------------------------------------------------------------------------------------------------------------------------------------------------------------------------------------------------------------------------------------------------------------------------------|-----------------------|------------|---|--|
| Probable global transcription activator SNF2L1                                                                                                                                                                                                                                                                                  | SMARCA1;Smarca1       | 0,84491963 | + |  |
| Regulator of chromosome condensation                                                                                                                                                                                                                                                                                            | RCC1                  | 0,84653388 | + |  |
| Cyclin-dependent kinase 11A;Cyclin-dependent kinase 11B                                                                                                                                                                                                                                                                         | CDK11A;CDK11B         | 0,84698232 | + |  |
| 39S ribosomal protein L1, mitochondrial                                                                                                                                                                                                                                                                                         | MRPL1                 | 0,84698423 | + |  |
| Pinin                                                                                                                                                                                                                                                                                                                           | PNN                   | 0,8496774  | + |  |
| Fatty acid synthase;[Acyl-carrier-protein] S-acetyltransferase;[Acyl-carrier-protein] S-malonyltransferase;3-oxoacyl-[acyl-carrier-protein] synthase;3-oxoacyl-[acyl-carrier-protein] reductase;3-hydroxyacyl-[acyl-carrier-protein] dehydratase;Enoyl-[acyl-carrier-protein] reductase;Oleoyl-[acyl-carrier-protein] hydrolase | FASN                  | 0,85016759 | + |  |
| Protein transport protein Sec31A                                                                                                                                                                                                                                                                                                | SEC31A                | 0,85054546 | + |  |
| Structural maintenance of chromosomes protein 1A                                                                                                                                                                                                                                                                                | SMC1A;smc1a           | 0,85207791 | + |  |
| Protein transport protein Sec23A                                                                                                                                                                                                                                                                                                | SEC23A                | 0,85275926 | + |  |
| Kinesin-like protein KIF1A                                                                                                                                                                                                                                                                                                      | KIF1A                 | 0,8551178  | + |  |
| Squalene synthase                                                                                                                                                                                                                                                                                                               | FDFT1                 | 0,85576375 | + |  |
| Eukaryotic translation initiation factor 2 subunit 3;Putative eukaryotic translation initiation factor 2 subunit 3-like protein;Eukaryotic translation initiation factor 2 subunit 3, X-linked;Eukaryotic translation initiation factor 2 subunit 3, Y-linked                                                                   | EIF2S3;Eif2s3;EIF2S3L | 0,85691494 | + |  |
| Heterogeneous nuclear ribonucleoprotein F;Heterogeneous nuclear ribonucleoprotein F, N-terminally processed                                                                                                                                                                                                                     | HNRNPF                | 0,85778597 | + |  |
| Squalene monooxygenase                                                                                                                                                                                                                                                                                                          | SQLE                  | 0,85792033 | + |  |
| T-complex protein 1 subunit alpha                                                                                                                                                                                                                                                                                               | TCP1;Tcp1             | 0,86092822 | + |  |

|                                                                                                        |             |            |   |  |
|--------------------------------------------------------------------------------------------------------|-------------|------------|---|--|
| 10 kDa heat shock protein, mitochondrial                                                               | HSPE1       | 0,86157121 | + |  |
| Quinone oxidoreductase                                                                                 | CRYZ        | 0,86160787 | + |  |
| Glycylpeptide N-tetradecanoyltransferase 1                                                             | NMT1        | 0,87303861 | + |  |
| Glutaredoxin-3                                                                                         | GLRX3       | 0,8834112  | + |  |
| Heat shock protein 105 kDa                                                                             | HSPH1       | 0,88477092 | + |  |
| Probable glutathione peroxidase 8                                                                      | GPX8        | 0,88546732 | + |  |
| Intraflagellar transport protein 27 homolog                                                            | IFT27       | 0,88639641 | + |  |
| Protein O-GlcNAcase                                                                                    | MGEA5;Mgea5 | 0,8876614  | + |  |
| Importin-4                                                                                             | IPO4        | 0,8891076  | + |  |
| Exosome complex component RRP43                                                                        | EXOSC8      | 0,89599164 | + |  |
| Protein DEK                                                                                            | DEK         | 0,89820035 | + |  |
| ADP-ribosylation factor-like protein 8A                                                                | ARL8A       | 0,89923392 | + |  |
| Synaptobrevin homolog YKT6                                                                             | YKT6        | 0,89995914 | + |  |
| Eukaryotic initiation factor 4A-I                                                                      | EIF4A1      | 0,90034993 | + |  |
| N-acetylserotonin O-methyltransferase-like protein                                                     | ASMTL       | 0,90054046 | + |  |
| Histidine--tRNA ligase, cytoplasmic                                                                    | HARS        | 0,90092129 | + |  |
| Glutamine--tRNA ligase                                                                                 | QARS        | 0,90180757 | + |  |
| Apoptosis regulator BAX                                                                                | BAX         | 0,90222761 | + |  |
| Cysteine and histidine-rich domain-containing protein 1                                                | CHORDC1     | 0,90228123 | + |  |
| Calcium-binding mitochondrial carrier protein Aralar2                                                  | SLC25A13    | 0,90638924 | + |  |
| Atlastin-1                                                                                             | ATL1        | 0,90722953 | + |  |
| 26S proteasome non-ATPase regulatory subunit 8                                                         | PSMD8       | 0,90734715 | + |  |
| Uridine 5-monophosphate synthase;Orotate phosphoribosyltransferase;Orotidine 5-phosphate decarboxylase | UMPS        | 0,91802639 | + |  |
| Ras-related protein Rab-18                                                                             | RAB18       | 0,92116186 | + |  |

|                                                                              |               |            |   |  |
|------------------------------------------------------------------------------|---------------|------------|---|--|
| 26S proteasome non-ATPase regulatory subunit 10                              | PSMD10        | 0,921548   | + |  |
| Lanosterol 14-alpha demethylase                                              | CYP51A1       | 0,92195278 | + |  |
| Membrane-associated progesterone receptor component 2                        | PGRMC2        | 0,92723952 | + |  |
| THO complex subunit 4                                                        | ALYREF        | 0,92735121 | + |  |
| Filamin-C                                                                    | FLNC          | 0,92777104 | + |  |
| Valine--tRNA ligase                                                          | VAR5          | 0,92905405 | + |  |
| Cleavage and polyadenylation specificity factor subunit 5                    | NUDT21        | 0,93198013 | + |  |
| Heterogeneous nuclear ribonucleoprotein U-like protein 1                     | HNRNPUL1      | 0,93243514 | + |  |
| Eukaryotic translation initiation factor 3 subunit F                         | EIF3F         | 0,93482166 | + |  |
| Septin-5                                                                     | SEPT5         | 0,93491491 | + |  |
| Eukaryotic translation initiation factor 3 subunit H                         | EIF3H         | 0,9407408  | + |  |
| NEDD8-activating enzyme E1 regulatory subunit                                | NAE1          | 0,94177945 | + |  |
| Sideroflexin-3                                                               | SFXN3         | 0,94284206 | + |  |
| Alcohol dehydrogenase class-3                                                | ADH5          | 0,94287194 | + |  |
| Dolichyl-diphosphooligosaccharide--protein glycosyltransferase subunit STT3B | STT3B         | 0,94328859 | + |  |
| 40S ribosomal protein S9                                                     | RPS9          | 0,945062   | + |  |
| Poly(rC)-binding protein 1                                                   | PCBP1         | 0,94605361 | + |  |
| Nuclear pore complex protein Nup85                                           | NUP85         | 0,95299551 | + |  |
| Lysine-specific histone demethylase 1A                                       | KDM1A         | 0,95578766 | + |  |
| Sister chromatid cohesion protein PDS5 homolog B                             | PDS5B         | 0,95589892 | + |  |
| 26S proteasome non-ATPase regulatory subunit 11                              | PSMD11        | 0,95619117 | + |  |
| Histone acetyltransferase type B catalytic subunit                           | HAT1          | 0,95839225 | + |  |
| Nuclear pore complex protein Nup155                                          | NUP155;Nup155 | 0,95919906 | + |  |

|                                                                             |                    |            |   |  |
|-----------------------------------------------------------------------------|--------------------|------------|---|--|
| Vacuolar protein sorting-associated protein 4B                              | VPS4B              | 0,95933194 | + |  |
| Eukaryotic translation initiation factor 3 subunit M                        | EIF3M              | 0,95983484 | + |  |
| Spermine synthase                                                           | SMS                | 0,95988231 | + |  |
| Actin-related protein 2;Actin-related protein 2-B                           | ACTR2;actr2b       | 0,96049881 | + |  |
| Adenine phosphoribosyltransferase                                           | APRT               | 0,96247821 | + |  |
| Ankycorbin                                                                  | RAI14              | 0,96523158 | + |  |
| Transmembrane protein 33                                                    | TMEM33             | 0,96590932 | + |  |
| 40S ribosomal protein S3                                                    | RPS3               | 0,96805848 | + |  |
| Eukaryotic translation initiation factor 3 subunit B                        | EIF3B              | 0,96913613 | + |  |
| Myosin regulatory light chain 12A;Myosin regulatory light chain 12B         | MYL12A;MYL12B      | 0,97154744 | + |  |
| Eukaryotic translation initiation factor 3 subunit D                        | EIF3D              | 0,97200288 | + |  |
| Protein phosphatase methylesterase 1                                        | PPME1              | 0,9724297  | + |  |
| DNA replication licensing factor MCM6                                       | MCM6               | 0,97616132 | + |  |
| Anamorsin                                                                   | CIAPIN1            | 0,9777209  | + |  |
| ADP-sugar pyrophosphatase                                                   | NUDT5              | 0,97962591 | + |  |
| Cullin-1                                                                    | Cul1;CUL1          | 0,98065461 | + |  |
| Splicing factor 45                                                          | RBM17              | 0,98133341 | + |  |
| Syntaxin-12                                                                 | STX12              | 0,9816316  | + |  |
| Hsc70-interacting protein;Putative protein FAM10A5;Putative protein FAM10A4 | ST13;ST13P5;ST13P4 | 0,98399353 | + |  |
| V-type proton ATPase subunit d 1                                            | ATP6VOD1           | 0,98763635 | + |  |
| Methionine adenosyltransferase 2 subunit beta                               | MAT2B              | 0,98799621 | + |  |
| Probable ATP-dependent RNA helicase DDX5                                    | DDX5               | 0,9885966  | + |  |
| Nucleoside diphosphate kinase B                                             | NME2               | 0,98965306 | + |  |



|                                                                                                                                           |                    |            |   |  |
|-------------------------------------------------------------------------------------------------------------------------------------------|--------------------|------------|---|--|
| Mycophenolic acid acyl-glucuronide esterase, mitochondrial                                                                                | ABHD10             | 0,99094348 | + |  |
| Ubiquitin-conjugating enzyme E2 E3;Ubiquitin-conjugating enzyme E2 E2                                                                     | UBE2E3;Ube2e3;UBE2 | 0,99097697 | + |  |
| Nuclear pore complex protein Nup133                                                                                                       | NUP133             | 0,99205356 | + |  |
| 5-3 exoribonuclease 2                                                                                                                     | XRN2               | 0,99258635 | + |  |
| GDP-L-fucose synthase                                                                                                                     | TSTA3              | 0,99589411 | + |  |
| Syntenin-1                                                                                                                                | SDCBP              | 0,99601788 | + |  |
| U2 snRNP-associated SURP motif-containing protein                                                                                         | U2SURP             | 0,99694697 | + |  |
| UDP-N-acetylglucosamine--peptide N-acetylglucosaminyltransferase 110 kDa subunit                                                          | OGT                | 0,99701733 | + |  |
| Proteasome subunit alpha type-1                                                                                                           | PSMA1              | 0,99923706 | + |  |
| Myosin light polypeptide 6                                                                                                                | MYL6               | 0,99941953 | + |  |
| Condensin complex subunit 3                                                                                                               | NCAPG              | 1,00285445 | + |  |
| Agrin;Agrin N-terminal 110 kDa subunit;Agrin C-terminal 110 kDa subunit;Agrin C-terminal 90 kDa fragment;Agrin C-terminal 22 kDa fragment | AGRN               | 1,00335926 | + |  |
| Exportin-2                                                                                                                                | CSE1L              | 1,00356144 | + |  |
| Fanconi anemia group I protein                                                                                                            | FANCI              | 1,00651783 | + |  |
| Isopentenyl-diphosphate Delta-isomerase 1                                                                                                 | IDI1               | 1,0073897  | + |  |
| Mitochondrial import receptor subunit TOM70                                                                                               | TOMM70A            | 1,00825564 | + |  |
| Selenide, water dikinase 1                                                                                                                | SEPHS1             | 1,0087293  | + |  |
| Synaptic vesicle membrane protein VAT-1 homolog-like                                                                                      | VAT1L              | 1,01057137 | + |  |
| Laminin subunit gamma-1                                                                                                                   | LAMC1              | 1,0107265  | + |  |
| DnaJ homolog subfamily C member 7                                                                                                         | DNAJC7             | 1,01387151 | + |  |
| Nucleolar GTP-binding protein 1                                                                                                           | GTPBP4             | 1,01682303 | + |  |

|                                                                            |         |            |   |  |
|----------------------------------------------------------------------------|---------|------------|---|--|
| Mesencephalic astrocyte-derived neurotrophic factor                        | MANF    | 1,02139431 | + |  |
| Proliferating cell nuclear antigen                                         | PCNA    | 1,02184698 | + |  |
| Signal recognition particle receptor subunit beta                          | SRPRB   | 1,0224639  | + |  |
| Casein kinase II subunit alpha                                             | CSNK2A2 | 1,0233061  | + |  |
| Ephrin type-A receptor 2                                                   | EPHA2   | 1,02584394 | + |  |
| Ubiquitin-conjugating enzyme E2 K                                          | UBE2K   | 1,03290727 | + |  |
| ELAV-like protein 3                                                        | ELAVL3  | 1,03751861 | + |  |
| Apoptosis inhibitor 5                                                      | API5    | 1,03793229 | + |  |
| Peptidyl-prolyl cis-trans isomerase FKBP10                                 | FKBP10  | 1,04088169 | + |  |
| Translocon-associated protein subunit delta                                | SSR4    | 1,04090563 | + |  |
| AP-3 complex subunit delta-1                                               | AP3D1   | 1,04234166 | + |  |
| Ubiquitin carboxyl-terminal hydrolase 14                                   | USP14   | 1,04278119 | + |  |
| 28 kDa heat- and acid-stable phosphoprotein                                | PDAP1   | 1,04491382 | + |  |
| Serine/threonine-protein phosphatase 2A catalytic subunit alpha isoform    | PPP2CA  | 1,04501343 | + |  |
| NADH dehydrogenase [ubiquinone] iron-sulfur protein 2, mitochondrial       | NDUFS2  | 1,04504479 | + |  |
| Electron transfer flavoprotein subunit beta                                | ETFB    | 1,04917781 | + |  |
| NADH dehydrogenase [ubiquinone] iron-sulfur protein 3, mitochondrial       | NDUFS3  | 1,05075328 | + |  |
| Serine/threonine-protein phosphatase 2A activator                          | PPP2R4  | 1,0543357  | + |  |
| Golgi-specific brefeldin A-resistance guanine nucleotide exchange factor 1 | GBF1    | 1,05519549 | + |  |
| Acetyl-CoA carboxylase 1;Biotin carboxylase                                | ACACA   | 1,05589909 | + |  |
| Replication factor C subunit 5                                             | RFC5    | 1,05746905 | + |  |

|                                                                                                                           |               |            |   |  |
|---------------------------------------------------------------------------------------------------------------------------|---------------|------------|---|--|
| NAD-dependent malic enzyme, mitochondrial                                                                                 | ME2           | 1,06008848 | + |  |
| Protein PBDC1                                                                                                             | PBDC1         | 1,06041993 | + |  |
| Regulator of nonsense transcripts 1                                                                                       | UPF1          | 1,0617307  | + |  |
| Methylmalonyl-CoA mutase, mitochondrial                                                                                   | MUT           | 1,06339433 | + |  |
| ATP-binding cassette sub-family D member 3                                                                                | ABCD3         | 1,06370862 | + |  |
| Structural maintenance of chromosomes protein 4                                                                           | SMC4          | 1,06396378 | + |  |
| Alcohol dehydrogenase [NADP(+)]                                                                                           | AKR1A1        | 1,06649611 | + |  |
| BTB/POZ domain-containing protein KCTD12                                                                                  | KCTD12;Kctd12 | 1,06699498 | + |  |
| DNA polymerase delta catalytic subunit                                                                                    | POLD1         | 1,06902334 | + |  |
| Band 4.1-like protein 2                                                                                                   | EPB41L2       | 1,07153087 | + |  |
| 26S protease regulatory subunit 10B                                                                                       | PSMC6         | 1,07276196 | + |  |
| Regulation of nuclear pre-mRNA domain-containing protein 1B                                                               | RPRD1B        | 1,07551363 | + |  |
| Cyclin-dependent kinase 1                                                                                                 | CDK1          | 1,08203782 | + |  |
| Synapsin-1                                                                                                                | SYN1          | 1,08556345 | + |  |
| Ornithine aminotransferase, mitochondrial;Ornithine aminotransferase, hepatic form;Ornithine aminotransferase, renal form | OAT           | 1,08617592 | + |  |
| 28S ribosomal protein S22, mitochondrial                                                                                  | MRPS22        | 1,08682378 | + |  |
| tRNA-splicing ligase RtcB homolog                                                                                         | RTCB;rtcb     | 1,08863449 | + |  |
| Succinate dehydrogenase [ubiquinone] flavoprotein subunit, mitochondrial                                                  | SDHA          | 1,08875423 | + |  |
| SUMO-activating enzyme subunit 1;SUMO-activating enzyme subunit 1, N-terminally processed                                 | SAE1          | 1,08953815 | + |  |
| 3-mercaptopyruvate sulfurtransferase                                                                                      | MPST          | 1,09141858 | + |  |
| cAMP-dependent protein kinase catalytic subunit alpha                                                                     | PRKACA        | 1,09949705 | + |  |

|                                                                                                |          |            |   |  |
|------------------------------------------------------------------------------------------------|----------|------------|---|--|
| Inosine-5-monophosphate dehydrogenase 2                                                        | IMPDH2   | 1,10493978 | + |  |
| Glucosamine-6-phosphate isomerase 1                                                            | GNPDA1   | 1,10534392 | + |  |
| Endoplasmic reticulum resident protein 44                                                      | ERP44    | 1,1056508  | + |  |
| ER membrane protein complex subunit 1                                                          | EMC1     | 1,10666614 | + |  |
| Delta-1-pyrroline-5-carboxylate synthase;Glutamate 5-kinase;Gamma-glutamyl phosphate reductase | ALDH18A1 | 1,10695733 | + |  |
| 26S proteasome non-ATPase regulatory subunit 1                                                 | PSMD1    | 1,10745769 | + |  |
| Replication factor C subunit 4                                                                 | RFC4     | 1,1082628  | + |  |
| Glutathione S-transferase omega-1                                                              | GSTO1    | 1,10830943 | + |  |
| Cytoplasmic dynein 1 light intermediate chain 1                                                | DYNC1LI1 | 1,10837788 | + |  |
| NADH-ubiquinone oxidoreductase 75 kDa subunit, mitochondrial                                   | NDUFS1   | 1,10967467 | + |  |
| Endophilin-A2                                                                                  | SH3GL1   | 1,11236042 | + |  |
| Elongation factor 1-delta                                                                      | EEF1D    | 1,11504322 | + |  |
| Calpain-2 catalytic subunit                                                                    | CAPN2    | 1,11789682 | + |  |
| Cytosol aminopeptidase                                                                         | LAP3     | 1,11820115 | + |  |
| Probable ATP-dependent RNA helicase DDX46                                                      | DDX46    | 1,11878671 | + |  |
| Copine-3                                                                                       | CPNE3    | 1,12190289 | + |  |
| Nucleolar transcription factor 1                                                               | UBTF     | 1,12599924 | + |  |
| GTPase NRas                                                                                    | NRAS     | 1,13142776 | + |  |
| 60S ribosomal protein L19                                                                      | RPL19    | 1,13175625 | + |  |
| Ras-related protein Rab-21                                                                     | RAB21    | 1,13661808 | + |  |
| Polyadenylate-binding protein 4                                                                | PABPC4   | 1,13796128 | + |  |
| DNA replication licensing factor MCM4                                                          | MCM4     | 1,14170096 | + |  |
| Low molecular weight phosphotyrosine protein phosphatase                                       | ACP1     | 1,14384058 | + |  |
| Protein RER1                                                                                   | RER1     | 1,14668761 | + |  |
| Nuclear cap-binding protein subunit 1                                                          | NCBP1    | 1,14675395 | + |  |

|                                                           |               |            |   |  |
|-----------------------------------------------------------|---------------|------------|---|--|
| Sorting and assembly machinery component 50 homolog       | SAMM50        | 1,14759827 | + |  |
| Serine/threonine-protein kinase 26                        | STK26         | 1,14860047 | + |  |
| Aminopeptidase B                                          | RNPEP         | 1,15134536 | + |  |
| Diablo homolog, mitochondrial                             | DIABLO        | 1,15148841 | + |  |
| Cleft lip and palate transmembrane protein 1              | CLPTM1        | 1,15618854 | + |  |
| Bleomycin hydrolase                                       | BLMH          | 1,15647719 | + |  |
| RNA-binding protein with serine-rich domain 1             | RNPS1         | 1,15653102 | + |  |
| Coronin-1A                                                | CORO1A;Coro1a | 1,15791215 | + |  |
| Sialic acid synthase                                      | NANS          | 1,15846146 | + |  |
| DNA replication licensing factor MCM2                     | MCM2;Mcm2     | 1,1607009  | + |  |
| Transaldolase                                             | TALDO1        | 1,16363313 | + |  |
| Synaptotagmin-1                                           | Syt1;SYT1     | 1,16573736 | + |  |
| Eukaryotic translation initiation factor 5B               | EIF5B         | 1,16850323 | + |  |
| Glycine cleavage system H protein, mitochondrial          | GCSH          | 1,16958915 | + |  |
| Vacuolar protein sorting-associated protein 29            | VPS29;vps29   | 1,17153422 | + |  |
| Exportin-T                                                | XPOT          | 1,17379231 | + |  |
| Stomatin-like protein 2, mitochondrial                    | STOML2        | 1,17472013 | + |  |
| Nck-associated protein 1                                  | NCKAP1;nckap1 | 1,17568694 | + |  |
| Chloride intracellular channel protein 4                  | CLIC4         | 1,17719523 | + |  |
| 26S protease regulatory subunit 8                         | PSMC5         | 1,17812665 | + |  |
| Importin subunit alpha-1                                  | KPNA2         | 1,1813221  | + |  |
| DNA (cytosine-5)-methyltransferase 1                      | DNMT1         | 1,18229421 | + |  |
| Calcium-binding mitochondrial carrier protein SCaMC-1     | SLC25A24      | 1,1828732  | + |  |
| Proteasome activator complex subunit 3                    | PSME3         | 1,18618562 | + |  |
| Serine/threonine-protein phosphatase PGAM5, mitochondrial | PGAM5         | 1,18735949 | + |  |
| C-terminal-binding protein 1                              | CTBP1         | 1,18810251 | + |  |

|                                                                                  |                 |            |   |  |
|----------------------------------------------------------------------------------|-----------------|------------|---|--|
| Ubiquitin-like modifier-activating enzyme 6                                      | UBA6            | 1,18917169 | + |  |
| Mitochondrial carrier homolog 2                                                  | MTCH2           | 1,18970256 | + |  |
| Ribonucleoside-diphosphate reductase subunit M2                                  | RRM2            | 1,19053099 | + |  |
| S-phase kinase-associated protein 1                                              | SKP1            | 1,19096947 | + |  |
| Coatomer subunit gamma-1                                                         | COPG1           | 1,19160737 | + |  |
| Exportin-5                                                                       | XPO5            | 1,19247754 | + |  |
| Histidine triad nucleotide-binding protein 1                                     | HINT1           | 1,19640308 | + |  |
| Transforming protein RhoA                                                        | Rhoa;RHOA;rhoab | 1,20195495 | + |  |
| Structural maintenance of chromosomes protein 2                                  | SMC2            | 1,20228174 | + |  |
| LETM1 and EF-hand domain-containing protein 1, mitochondrial                     | LETM1           | 1,20574273 | + |  |
| Double-stranded RNA-binding protein Staufen homolog 1                            | STAU1           | 1,21546872 | + |  |
| SWI/SNF complex subunit SMARCC1                                                  | SMARCC1;Smarcc1 | 1,21738921 | + |  |
| Macrophage migration inhibitory factor                                           | MIF;Mif         | 1,21811401 | + |  |
| Trifunctional enzyme subunit beta, mitochondrial;3-ketoacyl-CoA thiolase         | HADHB           | 1,21991603 | + |  |
| E3 ubiquitin-protein ligase UBR4                                                 | UBR4            | 1,22438007 | + |  |
| Mitochondrial import receptor subunit TOM40 homolog                              | TOMM40          | 1,22960154 | + |  |
| Structural maintenance of chromosomes flexible hinge domain-containing protein 1 | SMCHD1          | 1,23066839 | + |  |
| SUMO-conjugating enzyme UBC9                                                     | Ube2i;UBE2I     | 1,23218918 | + |  |
| Eukaryotic translation initiation factor 5                                       | EIF5            | 1,2381293  | + |  |
| 1-phosphatidylinositol 4,5-bisphosphate phosphodiesterase gamma-1                | PLCG1           | 1,24022484 | + |  |
| Methylsterol monooxygenase 1                                                     | MSMO1           | 1,24659877 | + |  |
| Tryptophan--tRNA ligase, cytoplasmic;T1-TrpRS;T2-TrpRS                           | WARS            | 1,24817318 | + |  |

|                                                                                                                                                |                      |            |   |  |
|------------------------------------------------------------------------------------------------------------------------------------------------|----------------------|------------|---|--|
| Microtubule-associated protein RP/EB family member 2                                                                                           | MAPRE2               | 1,24869453 | + |  |
| Symplekin                                                                                                                                      | SYMPK                | 1,24962786 | + |  |
| Glyoxylate reductase/hydroxypyruvate reductase                                                                                                 | GRHPR                | 1,24965096 | + |  |
| 4-trimethylaminobutyraldehyde dehydrogenase                                                                                                    | ALDH9A1              | 1,25107638 | + |  |
| N-alpha-acetyltransferase 15, NatA auxiliary subunit                                                                                           | NAA15                | 1,26060253 | + |  |
| tRNA (cytosine(34)-C(5))-methyltransferase                                                                                                     | NSUN2                | 1,26419301 | + |  |
| Ribose-phosphate pyrophosphokinase 1                                                                                                           | PRPS1                | 1,26651658 | + |  |
| Eukaryotic translation initiation factor 5A-1;Eukaryotic translation initiation factor 5A-1-like;Eukaryotic translation initiation factor 5A-2 | EIF5A;EIF5AL1;EIF5A2 | 1,26715575 | + |  |
| Gamma-glutamyl hydrolase                                                                                                                       | GGH                  | 1,26757537 | + |  |
| Rab GTPase-activating protein 1                                                                                                                | RABGAP1              | 1,26782735 | + |  |
| CUGBP Elav-like family member 1                                                                                                                | CELF1;Celf1          | 1,27082994 | + |  |
| Nuclear pore complex protein Nup93                                                                                                             | NUP93                | 1,27744166 | + |  |
| Tubulin polymerization-promoting protein family member 3                                                                                       | TPPP3                | 1,27820799 | + |  |
| Importin subunit alpha-4                                                                                                                       | Kpna3;KPNA3          | 1,27962981 | + |  |
| Double-stranded RNA-binding protein Staufen homolog 2                                                                                          | STAU2                | 1,28062312 | + |  |
| Small nuclear ribonucleoprotein Sm D1                                                                                                          | SNRPD1               | 1,28078588 | + |  |
| 26S proteasome non-ATPase regulatory subunit 7                                                                                                 | PSMD7                | 1,29013634 | + |  |
| SH3 and PX domain-containing protein 2B                                                                                                        | SH3PXD2B             | 1,29430347 | + |  |
| EH domain-containing protein 1                                                                                                                 | EHD1                 | 1,29486889 | + |  |
| Creatine kinase U-type, mitochondrial                                                                                                          | CKMT1A               | 1,29677412 | + |  |
| AP-1 complex subunit beta-1                                                                                                                    | AP1B1;Ap1b1          | 1,29709562 | + |  |
| Echinoderm microtubule-associated protein-like 4                                                                                               | EML4                 | 1,29756249 | + |  |

|                                                             |                 |            |   |  |
|-------------------------------------------------------------|-----------------|------------|---|--|
| Transportin-1                                               | TNPO1           | 1,2988063  | + |  |
| Junction plakoglobin                                        | JUP             | 1,30739339 | + |  |
| Polyadenylate-binding protein-interacting protein 1         | PAIP1           | 1,3093124  | + |  |
| Spermidine synthase                                         | SRM             | 1,31046973 | + |  |
| Superoxide dismutase [Mn], mitochondrial                    | SOD2            | 1,31601312 | + |  |
| Calponin-2                                                  | CNN2            | 1,32280413 | + |  |
| Proline-, glutamic acid- and leucine-rich protein 1         | PELP1           | 1,32325384 | + |  |
| Nodal modulator 2;Nodal modulator 3;Nodal modulator 1       | NOMO2;NOMO3;NOM | 1,33712133 | + |  |
| DNA replication licensing factor MCM5                       | MCM5            | 1,34007666 | + |  |
| Fructose-bisphosphate aldolase C                            | ALDOC           | 1,34261025 | + |  |
| Phosphomevalonate kinase                                    | PMVK            | 1,3451182  | + |  |
| Leucine--tRNA ligase, cytoplasmic                           | LARS            | 1,3463548  | + |  |
| GMP synthase [glutamine-hydrolyzing]                        | GMPS            | 1,34731123 | + |  |
| Vacuolar protein sorting-associated protein 26A             | VPS26A          | 1,34943602 | + |  |
| Acylglycerol kinase, mitochondrial                          | AGK             | 1,35339419 | + |  |
| Sterol-4-alpha-carboxylate 3-dehydrogenase, decarboxylating | NSDHL           | 1,35563893 | + |  |
| Replication factor C subunit 2                              | RFC2;Rfc2       | 1,36727333 | + |  |
| Phosphoribosyl pyrophosphate synthase-associated protein 2  | PRPSAP2         | 1,37010574 | + |  |
| Translationally-controlled tumor protein                    | TPT1            | 1,37118318 | + |  |
| L-lactate dehydrogenase A chain                             | LDHA            | 1,37382317 | + |  |
| Serotransferrin                                             | TF              | 1,37452168 | + |  |
| rRNA 2-O-methyltransferase fibrillarin                      | FBL             | 1,37890095 | + |  |
| Cilia- and flagella-associated protein 20                   | CFAP20          | 1,38244353 | + |  |
| Asparagine synthetase [glutamine-hydrolyzing]               | ASNS            | 1,38304392 | + |  |
| Myelin expression factor 2                                  | MYEF2           | 1,38640277 | + |  |



|                                                                  |                    |            |   |  |
|------------------------------------------------------------------|--------------------|------------|---|--|
| Ubiquitin carboxyl-terminal hydrolase isozyme L5                 | UCHL5              | 1,3929437  | + |  |
| NAD(P) transhydrogenase, mitochondrial                           | NNT                | 1,39506065 | + |  |
| Serine/threonine-protein kinase VRK1                             | VRK1               | 1,3966287  | + |  |
| BolA-like protein 2                                              | BOLA2              | 1,39900398 | + |  |
| Serine/threonine-protein phosphatase PP1-alpha catalytic subunit | PPP1CA             | 1,40087403 | + |  |
| 40S ribosomal protein S15a                                       | RPS15A             | 1,40176688 | + |  |
| DNA replication licensing factor MCM3                            | MCM3               | 1,4035812  | + |  |
| Programmed cell death 6-interacting protein                      | PDCD6IP            | 1,40365707 | + |  |
| Aldose reductase                                                 | AKR1B1             | 1,40620316 | + |  |
| Protein ERGIC-53                                                 | LMAN1              | 1,40865495 | + |  |
| Amidophosphoribosyltransferase                                   | PPAT               | 1,40898344 | + |  |
| AP-3 complex subunit beta-1                                      | AP3B1              | 1,40919198 | + |  |
| V-type proton ATPase 116 kDa subunit a isoform 1                 | ATP6VOA1           | 1,4100469  | + |  |
| Dihydrofolate reductase                                          | DHFR               | 1,41320165 | + |  |
| 60S ribosomal protein L10                                        | RPL10              | 1,42001449 | + |  |
| Casein kinase II subunit alpha;Casein kinase II subunit alpha 3  | Csnk2a1;CSNK2A1;CS | 1,42455716 | + |  |
| Rabankyrin-5                                                     | ANKFY1             | 1,430201   | + |  |
| Lactoylglutathione lyase                                         | GLO1               | 1,44422616 | + |  |
| ATP-dependent 6-phosphofructokinase, liver type                  | PFKL               | 1,44787788 | + |  |
| DnaJ homolog subfamily B member 11                               | DNAJB11            | 1,44850201 | + |  |
| Cytochrome b5 type B                                             | CYB5B              | 1,4577891  | + |  |
| ATP-binding cassette sub-family E member 1                       | ABCE1              | 1,46688165 | + |  |
| Neural cell adhesion molecule L1                                 | L1CAM              | 1,46708934 | + |  |
| Beta-soluble NSF attachment protein                              | NAPB               | 1,46821361 | + |  |
| Superkiller viralicidic activity 2-like 2                        | SKIV2L2            | 1,47076183 | + |  |
| Histone-arginine methyltransferase CARM1                         | CARM1              | 1,47321447 | + |  |

|                                                                                                                     |                |            |   |  |
|---------------------------------------------------------------------------------------------------------------------|----------------|------------|---|--|
| AP-3 complex subunit mu-1                                                                                           | AP3M1          | 1,47604307 | + |  |
| Signal transducer and activator of transcription 1-alpha/beta                                                       | STAT1          | 1,4764542  | + |  |
| Copine-1                                                                                                            | CPNE1          | 1,48263359 | + |  |
| Single-stranded DNA-binding protein, mitochondrial                                                                  | SSBP1          | 1,48416011 | + |  |
| Thioredoxin reductase 1, cytoplasmic                                                                                | TXNRD1         | 1,48630291 | + |  |
| Lethal(2) giant larvae protein homolog 1                                                                            | LLGL1;Llg1     | 1,48706245 | + |  |
| Glutamine--fructose-6-phosphate aminotransferase [isomerizing] 1                                                    | GFPT1          | 1,4924433  | + |  |
| Plastin-3                                                                                                           | PLS3           | 1,49344381 | + |  |
| Ankyrin-2                                                                                                           | ANK2           | 1,49850718 | + |  |
| 3-ketoacyl-CoA thiolase, mitochondrial                                                                              | ACAA2          | 1,49996482 | + |  |
| Dolichyl-diphosphooligosaccharide--protein glycosyltransferase subunit DAD1                                         | Dad1;DAD1      | 1,50628026 | + |  |
| Cysteine and glycine-rich protein 2                                                                                 | CSRP2          | 1,51664988 | + |  |
| Ribonucleoside-diphosphate reductase large subunit                                                                  | RRM1           | 1,51934963 | + |  |
| Ras-related protein Rab-2B                                                                                          | RAB2B          | 1,52369372 | + |  |
| Small nuclear ribonucleoprotein Sm D3                                                                               | SNRPD3         | 1,52862612 | + |  |
| Vesicle-trafficking protein SEC22b                                                                                  | SEC22B         | 1,53125276 | + |  |
| Ubiquitin carboxyl-terminal hydrolase 10                                                                            | USP10          | 1,53869883 | + |  |
| Eukaryotic peptide chain release factor subunit 1                                                                   | ETF1           | 1,54195086 | + |  |
| Ras GTPase-activating-like protein IQGAP1                                                                           | IQGAP1         | 1,54405997 | + |  |
| Aminoacyl tRNA synthase complex-interacting multifunctional protein 1;Endothelial monocyte-activating polypeptide 2 | AIMP1          | 1,55432426 | + |  |
| ADP-ribosylation factor 1;ADP-ribosylation factor 3                                                                 | Arf1;ARF1;ARF3 | 1,562301   | + |  |

|                                                                                               |               |            |   |  |
|-----------------------------------------------------------------------------------------------|---------------|------------|---|--|
| ATPase family AAA domain-containing protein 1;ATPase family AAA domain-containing protein 1-B | ATAD1;atad1b  | 1,56366009 | + |  |
| Condensin complex subunit 1                                                                   | NCAPD2        | 1,57342254 | + |  |
| Putative ATP-dependent RNA helicase DHX30                                                     | DHX30         | 1,57458687 | + |  |
| DnaJ homolog subfamily A member 1                                                             | DNAJA1;Dnaja1 | 1,57503446 | + |  |
| Transcription elongation factor B polypeptide 1                                               | TCEB1         | 1,58280585 | + |  |
| 2-oxoglutarate dehydrogenase, mitochondrial                                                   | OGDH          | 1,59054989 | + |  |
| RNA-binding protein 4                                                                         | RBM4          | 1,59804175 | + |  |
| CDGSH iron-sulfur domain-containing protein 2                                                 | CISD2;Cisd2   | 1,60473484 | + |  |
| COP9 signalosome complex subunit 2                                                            | COPS2         | 1,61503855 | + |  |
| Four and a half LIM domains protein 1                                                         | FHL1;Fhl1     | 1,61602105 | + |  |
| 26S proteasome non-ATPase regulatory subunit 12                                               | PSMD12        | 1,61712053 | + |  |
| Eukaryotic translation initiation factor 3 subunit I                                          | EIF3I         | 1,63669247 | + |  |
| NHP2-like protein 1;NHP2-like protein 1, N-terminally processed                               | NHP2L1        | 1,64543682 | + |  |
| mRNA export factor                                                                            | RAE1          | 1,64564217 | + |  |
| Cancer-related nucleoside-triphosphatase                                                      | NTPCR         | 1,65407817 | + |  |
| Serine/threonine-protein phosphatase 2A 56 kDa regulatory subunit epsilon isoform             | PPP2R5E       | 1,65412649 | + |  |
| DNA replication licensing factor MCM7                                                         | MCM7          | 1,66373634 | + |  |
| 60S ribosomal protein L27                                                                     | RPL27         | 1,66913626 | + |  |
| 26S proteasome non-ATPase regulatory subunit 5                                                | PSMD5         | 1,67783546 | + |  |
| Acetyl-CoA acetyltransferase, cytosolic                                                       | ACAT2         | 1,68484137 | + |  |
| Solute carrier family 2, facilitated glucose transporter member 1                             | SLC2A1        | 1,7083274  | + |  |

|                                                                                               |               |            |   |  |
|-----------------------------------------------------------------------------------------------|---------------|------------|---|--|
| Perilipin-3                                                                                   | PLIN3         | 1,71646457 | + |  |
| Delta(24)-sterol reductase                                                                    | DHCR24        | 1,73236232 | + |  |
| FAS-associated factor 2                                                                       | FAF2          | 1,73505211 | + |  |
| Heat shock 70 kDa protein 4L                                                                  | HSPA4L        | 1,7407928  | + |  |
| Glypican-4;Secreted glypican-4                                                                | GPC4          | 1,75487497 | + |  |
| Small nuclear ribonucleoprotein-associated proteins B and B                                   | SNRPB         | 1,75680796 | + |  |
| Importin subunit alpha-5;Importin subunit alpha-5, N-terminally processed                     | KPNA1;Kpna1   | 1,76424514 | + |  |
| Myotrophin                                                                                    | MTPN          | 1,7719858  | + |  |
| Aminoacyl tRNA synthase complex-interacting multifunctional protein 2                         | AIMP2         | 1,78462558 | + |  |
| Thioredoxin                                                                                   | TXN           | 1,79231008 | + |  |
| Actin-related protein 2/3 complex subunit 4                                                   | Arpc4;ARPC4   | 1,79283778 | + |  |
| 40S ribosomal protein S27-like                                                                | RPS27L        | 1,79476293 | + |  |
| Eukaryotic initiation factor 4A-II;Eukaryotic initiation factor 4A-II, N-terminally processed | EIF4A2        | 1,8018411  | + |  |
| S-adenosylmethionine synthase isoform type-2                                                  | MAT2A         | 1,80378787 | + |  |
| Leucine-rich repeat-containing protein 40                                                     | LRRC40        | 1,80677817 | + |  |
| LIM and SH3 domain protein 1                                                                  | LASP1         | 1,80794885 | + |  |
| Elongation factor 1-alpha 2                                                                   | EEF1A2;Eef1a2 | 1,80938085 | + |  |
| Small glutamine-rich tetratricopeptide repeat-containing protein alpha                        | SGTA          | 1,82048522 | + |  |
| D-3-phosphoglycerate dehydrogenase                                                            | PHGDH         | 1,82128949 | + |  |
| Actin-like protein 6A                                                                         | ACTL6A;Actl6a | 1,82179472 | + |  |
| Histone-binding protein RBBP7                                                                 | RBBP7         | 1,86049122 | + |  |
| Ran-specific GTPase-activating protein                                                        | RANBP1;Ranbp1 | 1,8705438  | + |  |
| BUB3-interacting and GLEBS motif-containing protein ZNF207                                    | ZNF207        | 1,87806087 | + |  |
| Unconventional myosin-Ib                                                                      | MYO1B         | 1,88188214 | + |  |

|                                                                                |                   |            |   |  |
|--------------------------------------------------------------------------------|-------------------|------------|---|--|
| Pyruvate dehydrogenase E1 component subunit alpha, somatic form, mitochondrial | PDHA1             | 1,88665432 | + |  |
| Ras-related protein Rab-6B                                                     | RAB6B             | 1,91266653 | + |  |
| Mitochondrial glutamate carrier 1; Mitochondrial glutamate carrier 2           | SLC25A22;SLC25A18 | 1,91282908 | + |  |
| Gamma-synuclein                                                                | SNCG              | 1,91344664 | + |  |
| Tyrosine-protein phosphatase non-receptor type 1                               | PTPN1             | 1,91481972 | + |  |
| Ras-related protein Rab-10                                                     | RAB10             | 1,94398859 | + |  |
| Translational activator GCN1                                                   | GCN1L1            | 1,94721307 | + |  |
| DNA mismatch repair protein Msh6                                               | MSH6              | 1,95109749 | + |  |
| Activator of 90 kDa heat shock protein ATPase homolog 1                        | AHSA1             | 1,95730146 | + |  |
| Aldehyde dehydrogenase family 16 member A1                                     | ALDH16A1          | 1,98171404 | + |  |
| Phosphoribosylformylglycinamide synthase                                       | PFAS              | 1,99841309 | + |  |
| Thymidylate synthase                                                           | TYMS              | 1,99952147 | + |  |
| Medium-chain specific acyl-CoA dehydrogenase, mitochondrial                    | ACADM             | 2,0000568  | + |  |
| Peptidyl-prolyl cis-trans isomerase-like 1                                     | PPIL1             | 2,01126713 | + |  |
| Inorganic pyrophosphatase                                                      | PPA1              | 2,02653122 | + |  |
| Protein FAM98B                                                                 | FAM98B            | 2,05904028 | + |  |
| Phospholipid hydroperoxide glutathione peroxidase, mitochondrial               | GPX4              | 2,06965658 | + |  |
| Protein NipSnap homolog 1                                                      | NIPSNAP1;Nipsnap1 | 2,08286815 | + |  |
| Histone deacetylase 2                                                          | HDAC2;Hdac2       | 2,13791275 | + |  |
| Cellular retinoic acid-binding protein 2                                       | CRABP2            | 2,14412202 | + |  |
| Eukaryotic translation initiation factor 2 subunit 2                           | EIF2S2            | 2,14471118 | + |  |
| 26S proteasome non-ATPase regulatory subunit 6                                 | PSMD6             | 2,15996827 | + |  |
| Adenylate kinase isoenzyme 1                                                   | AK1               | 2,16386965 | + |  |

|                                                                                                                                                         |                   |            |   |  |
|---------------------------------------------------------------------------------------------------------------------------------------------------------|-------------------|------------|---|--|
| Dynein light chain 2, cytoplasmic                                                                                                                       | DYNLL2            | 2,23186874 | + |  |
| GTP-binding protein SAR1a                                                                                                                               | SAR1A             | 2,24796465 | + |  |
| Tricarboxylate transport protein, mitochondrial                                                                                                         | SLC25A1           | 2,28178279 | + |  |
| Ubiquitin-conjugating enzyme E2 N;Ubiquitin-conjugating enzyme E2 35;Ubiquitin-conjugating enzyme E2 36;Putative ubiquitin-conjugating enzyme E2 N-like | UBE2N;Ube2n;UBC35 | 2,29580328 | + |  |
| Signal recognition particle 9 kDa protein                                                                                                               | SRP9              | 2,31755235 | + |  |
| DNA topoisomerase 2-alpha                                                                                                                               | TOP2A             | 2,34728707 | + |  |
| Saccharopine dehydrogenase-like oxidoreductase                                                                                                          | SCCPDH            | 2,37124464 | + |  |
| Peroxiredoxin-4                                                                                                                                         | PRDX4;Prdx4       | 2,38741154 | + |  |
| 60S ribosomal protein L26;60S ribosomal protein L26-like 1                                                                                              | RPL26;RPL26L1     | 2,44196616 | + |  |
| Thymidylate kinase                                                                                                                                      | DTYMK             | 2,60647668 | + |  |
| L-xylulose reductase                                                                                                                                    | DCXR              | 2,62080744 | + |  |
| Tubulin alpha-1B chain;Tubulin alpha-4A chain                                                                                                           | TUBA1B;TUBA4A     | 2,72059165 | + |  |

**Supplementary Table 3. List of the 118 dysregulated proteins in p.A53T neurons that were restored upon treatment with BX795**

| Gene Name | Protein Name                             | Biological Process | -Log ANOVA p | ANOVA q-value |
|-----------|------------------------------------------|--------------------|--------------|---------------|
| SH3GL1    | Endophilin-A2                            | Cell Membrane      | 256.133      | 0,011476      |
| MIF       | Macrophage migration inhibitory facto    | Cytokine           | 180.931      | 0,0363767     |
| ACTR2     | Actin-related protein 2                  | Cytoskeleton       | 194.818      | 0,030058      |
| CAPZB     | F-actin-capping protein subunit beta     | Cytoskeleton       | 46.958       | 0,000648649   |
| DYNLL2    | Dynein light chain 2, cytoplasmic        | Cytoskeleton       | 278.624      | 0,00791795    |
| JUP       | Junction plakoglobin                     | Cytoskeleton       | 184.446      | 0,0338618     |
| MARCKSL1  | MARCKS-related protein                   | Cytoskeleton       | 182.146      | 0,0355364     |
| SNCG      | Gamma-synuclein                          | Cytoskeleton       | 369.107      | 0,0025        |
| TUBB      | Tubulin beta chain                       | Cytoskeleton       | 328.033      | 0,004         |
| HAT1      | Histone acetyltransferase type B cataly  | DNA Organization   | 193.087      | 0,0303367     |
| ACO2      | Aconitate hydratase, mitochondrial       | Metabolism         | 239.553      | 0,0147068     |
| ACP1      | Low molecular weight phosphotyrosine     | Metabolism         | 223.884      | 0,0187195     |
| ALDOC     | Fructose-bisphosphate aldolase C         | Metabolism         | 19.283       | 0,0305445     |
| DCXR      | L-xylulose reductase                     | Metabolism         | 450.627      | 0,000888889   |
| DTYMK     | Thymidylate kinase                       | Metabolism         | 429.648      | 0,00128302    |
| GPX4      | Phospholipid hydroperoxide glutathion    | Metabolism         | 313.215      | 0,00468571    |
| MSMO1     | Methylsterol monooxygenase 1             | Metabolism         | 23.571       | 0,0159706     |
| NANS      | Sialic acid synthase                     | Metabolism         | 197.987      | 0,0284313     |
| OGDH      | 2-oxoglutarate dehydrogenase, mitoch     | Metabolism         | 189.588      | 0,0314673     |
| TSTA3     | GDP-L-fucose synthase                    | Metabolism         | 471.268      | 0,000666667   |
| ALDH5A1   | Succinate-semialdehyde dehydrogenas      | Neuronal           | 281.456      | 0,00780645    |
| ATXN10    | Ataxin-10                                | Neuronal           | 36.278       | 0,00266667    |
| INA       | Alpha-internexin                         | Neuronal           | 261.725      | 0,0103014     |
| NIPSNAP1  | Protein NipSnap homolog 1                | Neuronal           | 201.319      | 0,0272045     |
| PAFAH1B1  | Platelet-activating factor acetylhydrola | Neuronal           | 416.529      | 0,00144262    |
| SYN1      | Synapsin-1                               | Neuronal           | 282.487      | 0,00773913    |
| HIST1H1E  | Histone H1.4                             | Nuclear Assembly   | 462.922      | 0,000682927   |
| TMPO      | Lamina-associated polypeptide 2, isofo   | Nuclear Assembly   | 273.826      | 0,00829268    |
| ACADM     | Medium-chain specific acyl-CoA dehyd     | Oxidative Stress   | 361.925      | 0,00273684    |
| CKMT1A    | Creatine kinase U-type, mitochondrial    | Oxidative Stress   | 169.957      | 0,0433538     |
| GOT2      | Aspartate aminotransferase, mitochon     | Oxidative Stress   | 195.739      | 0,0293862     |

|          |                                          |                                 |         |             |
|----------|------------------------------------------|---------------------------------|---------|-------------|
| GPX1     | Glutathione peroxidase 1                 | Oxidative Stress                | 256.414 | 0,0115088   |
| MDH2     | Malate dehydrogenase, mitochondrial      | Oxidative Stress                | 325.647 | 0,00410256  |
| MTCH2    | Mitochondrial carrier homolog 2          | Oxidative Stress                | 2.402   | 0,0146818   |
| PDHA1    | Pyruvate dehydrogenase E1 component      | Oxidative Stress                | 222.971 | 0,0189673   |
| STOML2   | Stomatin-like protein 2, mitochondrial   | Oxidative Stress                | 313.378 | 0,00475362  |
| TOMM70A  | Mitochondrial import receptor subunit    | Oxidative Stress                | 181.295 | 0,0362534   |
| ATP1B1   | Sodium/potassium-transporting ATPase     | Plasma Membrane                 | 192.654 | 0,0305888   |
| ANKFY1   | Rabkaryrin-5                             | Protein Modification and Transp | 23.323  | 0,0163      |
| AP3M1    | AP-3 complex subunit mu-1                | Protein Modification and Transp | 178.641 | 0,0375263   |
| ATP6V0D1 | V-type proton ATPase subunit d 1         | Protein Modification and Transp | 186.993 | 0,0326792   |
| CCT8     | T-complex protein 1 subunit theta        | Protein Modification and Transp | 449.206 | 0,000956522 |
| CKAP4    | Cytoskeleton-associated protein 4        | Protein Modification and Transp | 271.468 | 0,00867308  |
| DAD1     | Dolichyl-diphosphooligosaccharide--pr    | Protein Modification and Transp | 270.969 | 0,00872381  |
| GDI2     | Rab GDP dissociation inhibitor beta      | Protein Modification and Transp | 194.495 | 0,0300524   |
| LAP3     | Cytosol aminopeptidase                   | Protein Modification and Transp | 19.891  | 0,0281967   |
| NAPB     | Beta-soluble NSF attachment protein      | Protein Modification and Transp | 263.779 | 0,00978802  |
| OGT      | UDP-N-acetylglucosamine--peptide N-a     | Protein Modification and Transp | 216.824 | 0,0208777   |
| PACSIN2  | Protein kinase C and casein kinase sub   | Protein Modification and Transp | 286.533 | 0,00715556  |
| PLIN3    | Perilipin-3                              | Protein Modification and Transp | 167.058 | 0,0455219   |
| RAB2B    | Ras-related protein Rab-2B               | Protein Modification and Transp | 377.583 | 0,00245783  |
| SAR1A    | GTP-binding protein SAR1a                | Protein Modification and Transp | 227.985 | 0,0173559   |
| SEC22B   | Vesicle-trafficking protein SEC22b       | Protein Modification and Transp | 189.207 | 0,0317391   |
| SRP9     | Signal recognition particle 9 kDa protei | Protein Modification and Transp | 357.866 | 0,00273469  |
| YKT6     | Synaptobrevin homolog YKT6               | Protein Modification and Transp | 201.411 | 0,0271685   |
| AIMP2    | Aminoacyl tRNA synthase complex-inte     | Protein Synthesis               | 540.207 | 0,00032     |
| EEF1D    | Elongation factor 1-delta                | Protein Synthesis               | 24.002  | 0,0146566   |
| EIF2B4   | Translation initiation factor eIF-2B sub | Protein Synthesis               | 277.038 | 0,00814141  |
| EIF4G2   | Eukaryotic translation initiation factor | Protein Synthesis               | 325.565 | 0,00403361  |
| FAM98B   | Protein FAM98B                           | Protein Synthesis               | 302.174 | 0,00571795  |
| GTPBP4   | Nucleolar GTP-binding protein 1          | Protein Synthesis               | 178.873 | 0,0375154   |
| KARS     | Lysine--tRNA ligase                      | Protein Synthesis               | 359.204 | 0,00272165  |
| MAT2A    | S-adenosylmethionine synthase isoform    | Protein Synthesis               | 350.993 | 0,00290196  |
| PHGDH    | D-3-phosphoglycerate dehydrogenase       | Protein Synthesis               | 106.486 | 0           |



|          |                                           |                     |         |             |
|----------|-------------------------------------------|---------------------|---------|-------------|
| PPA1     | Inorganic pyrophosphatase                 | Protein Synthesis   | 203.525 | 0,0261486   |
| PRMT1    | Protein arginine N-methyltransferase 1    | Protein Synthesis   | 558.198 | 0,000190476 |
| RARS     | Arginine--tRNA ligase, cytoplasmic        | Protein Synthesis   | 34.511  | 0,00316981  |
| RPL12    | 60S ribosomal protein L12                 | Protein Synthesis   | 236.748 | 0,0156444   |
| RPL31    | 60S ribosomal protein L31                 | Protein Synthesis   | 241.579 | 0,0145385   |
| RPS3     | 40S ribosomal protein S3                  | Protein Synthesis   | 321.674 | 0,0043252   |
| RPS6     | 40S ribosomal protein S6                  | Protein Synthesis   | 295.529 | 0,0064878   |
| RTCB     | tRNA-splicing ligase RtcB homolog         | Protein Synthesis   | 347.921 | 0,00303846  |
| VARS     | Valine--tRNA ligase                       | Protein Synthesis   | 302.941 | 0,00571429  |
| WARS     | Tryptophan--tRNA ligase, cytoplasmic;     | Protein Synthesis   | 233.632 | 0,0162437   |
| DEK      | Protein DEK                               | RNA Metabolism      | 19.105  | 0,0308276   |
| HINT1    | Histidine triad nucleotide-binding prot   | RNA Metabolism      | 417.925 | 0,00135593  |
| HNRNPUL1 | Heterogeneous nuclear ribonucleoprot      | RNA Metabolism      | 213.047 | 0,0220917   |
| MYEF2    | Myelin expression factor 2                | RNA Metabolism      | 178.281 | 0,0377856   |
| NHP2L1   | NHP2-like protein 1;NHP2-like protein     | RNA Metabolism      | 395.001 | 0,00191781  |
| NUP93    | Nuclear pore complex protein Nup93        | RNA Metabolism      | 290.302 | 0,00691954  |
| PCBP1    | Poly(rC)-binding protein 1                | RNA Metabolism      | 617.692 | 0           |
| PCBP2    | Poly(rC)-binding protein 2                | RNA Metabolism      | 242.141 | 0,0143938   |
| RAE1     | mRNA export factor                        | RNA Metabolism      | 231.102 | 0,0169645   |
| RBM4     | RNA-binding protein 4                     | RNA Metabolism      | 23.421  | 0,0162464   |
| RRM2     | Ribonucleoside-diphosphate reductase      | RNA Metabolism      | 311.101 | 0,00472222  |
| SKIV2L2  | Superkiller viralicidic activity 2-like 2 | RNA Metabolism      | 395.007 | 0,00194444  |
| SNRPB    | Small nuclear ribonucleoprotein-associ    | RNA Metabolism      | 19.464  | 0,0300842   |
| UBTF     | Nucleolar transcription factor 1          | RNA Metabolism      | 252.596 | 0,0123729   |
| YLPM1    | YLP motif-containing protein 1            | RNA Metabolism      | 347.249 | 0,00304762  |
| ZNF207   | BUB3-interacting and GLEBS motif-con      | RNA Metabolism      | 280.434 | 0,00785263  |
| API5     | Apoptosis inhibitor 5                     | Signal Transduction | 192.253 | 0,03041     |
| BOLA2    | BolA-like protein 2                       | Signal Transduction | 243.992 | 0,0139765   |
| CRABP2   | Cellular retinoic acid-binding protein 2  | Signal Transduction | 652.555 | 0           |
| CSK      | Tyrosine-protein kinase CSK               | Signal Transduction | 302.647 | 0,00570323  |
| MTPN     | Myotrophin                                | Signal Transduction | 536.379 | 0,000307692 |
| STAT1    | Signal transducer and activator of trans  | Signal Transduction | 250.904 | 0,0127197   |
| ZYX      | Zyxin                                     | Signal Transduction | 323.528 | 0,00406557  |

|         |                                          |                 |         |             |
|---------|------------------------------------------|-----------------|---------|-------------|
| ATG4B   | Cysteine protease ATG4B                  | Stress Response | 30.765  | 0,00512752  |
| CUL1    | Cullin-1                                 | Stress Response | 205.844 | 0,0253684   |
| DNAJA1  | DnaJ homolog subfamily A member 1        | Stress Response | 264.155 | 0,00980465  |
| DNAJB11 | DnaJ homolog subfamily B member 11       | Stress Response | 234.026 | 0,0161727   |
| DNM2    | Dynamin-2                                | Stress Response | 185.961 | 0,0332459   |
| GCN1L1  | Translational activator GCN1             | Stress Response | 57.176  | 0           |
| HSPA4   | Heat shock 70 kDa protein 4              | Stress Response | 325.383 | 0,004       |
| OTUB1   | Ubiquitin thioesterase OTUB1             | Stress Response | 351.675 | 0,00289109  |
| PDCD6IP | Programmed cell death 6-interacting p    | Stress Response | 300.728 | 0,00585987  |
| PSMA3   | Proteasome subunit alpha type-3          | Stress Response | 318.164 | 0,00443077  |
| PSMD12  | 26S proteasome non-ATPase regulator      | Stress Response | 269.053 | 0,00904265  |
| PSME3   | Proteasome activator complex subunit     | Stress Response | 331.891 | 0,00378947  |
| PTPN1   | Tyrosine-protein phosphatase non-recd    | Stress Response | 349.068 | 0,00291262  |
| SGTA    | Small glutamine-rich tetratricopeptide   | Stress Response | 191.864 | 0,0304814   |
| STIP1   | Stress-induced-phosphoprotein 1          | Stress Response | 303.961 | 0,00565789  |
| TCP1    | T-complex protein 1 subunit alpha        | Stress Response | 480.438 | 0,000685714 |
| UBA6    | Ubiquitin-like modifier-activating enzym | Stress Response | 226.136 | 0,0179532   |
| UCHL1   | Ubiquitin carboxyl-terminal hydrolase i  | Stress Response | 555.947 | 0,000181818 |
| VCP     | Transitional endoplasmic reticulum AT    | Stress Response | 263.882 | 0,00983333  |
| VPS35   | Vacuolar protein sorting-associated pro  | Stress Response | 303.784 | 0,00564706  |
| TPD52L2 | Tumor protein D54                        | Unknown         | 19.239  | 0,0305592   |

**pplementary Table 4. GO analysis for cellular compartment between pA53T and control neuro**

| <b>Cellular Compartment</b>                        | <b>No of genes</b> | <b>P-Value</b> | <b>Bonferroni</b> |
|----------------------------------------------------|--------------------|----------------|-------------------|
| extracellular exosome                              | 299                | 1,6E-75        | 1,0E-72           |
| membrane                                           | 204                | 2,8E-38        | 1,7E-35           |
| nucleoplasm                                        | 230                | 7,9E-36        | 4,8E-33           |
| cytoplasm                                          | 334                | 2,2E-32        | 1,3E-29           |
| mitochondrion                                      | 118                | 1,6E-19        | 9,5E-17           |
| nucleus                                            | 292                | 6,3E-15        | 3,9E-12           |
| nuclear pore                                       | 22                 | 6,7E-14        | 4,1E-11           |
| intracellular ribonucleoprotein complex            | 29                 | 7,5E-14        | 4,6E-11           |
| nucleosome                                         | 23                 | 2,4E-12        | 1,4E-9            |
| nuclear chromosome, telomeric region               | 26                 | 8,1E-12        | 4,9E-9            |
| nuclear nucleosome                                 | 16                 | 2,1E-11        | 1,3E-8            |
| nuclear envelope                                   | 28                 | 2,5E-11        | 1,5E-8            |
| proteasome complex                                 | 18                 | 2,8E-11        | 1,7E-8            |
| focal adhesion                                     | 43                 | 4,4E-10        | 2,7E-7            |
| eukaryotic translation initiation factor 3 complex | 10                 | 2,1E-9         | 1,3E-6            |
| proteasome accessory complex                       | 9                  | 5,6E-8         | 3,4E-5            |
| chaperonin-containing T-complex                    | 7                  | 1,8E-7         | 1,1E-4            |
| nuclear membrane                                   | 27                 | 3,3E-7         | 2,0E-4            |
| cell body                                          | 14                 | 3,6E-7         | 2,2E-4            |
| proteasome regulatory particle                     | 7                  | 9,3E-7         | 5,7E-4            |
| eukaryotic translation initiation factor 3 complex | 6                  | 1,3E-6         | 7,8E-4            |
| axon cytoplasm                                     | 10                 | 3,40E-06       | 7,3E-5            |

**Supplementary Table 5. Primers used in the current study**

| <b>Gene name</b> | <b>Application</b> | <b>Forward</b>         | <b>Reverse</b>         |
|------------------|--------------------|------------------------|------------------------|
| TH               | RT-PCR             | TGTCTGAGGAGCCTGAGATTCG | GCTTGTCCCTGGCGTCACTG   |
| Nurr1            | RT-PCR             | TCGACATTTCTGCCTTCTCCTG | GGTTCCTTGAGCCCGTGTCT   |
| AADC             | RT-PCR             | TGCGAGCAGAGAGGGAGTAG   | TGAGTTCCATGAAGGCAGGATG |

**Supplementary Table 6. Primary antibodies used in the current study**

| <b>Name</b>                                      | <b>Host</b> | <b>Dilution</b> | <b>Vendor</b>            | <b>Catalog#</b> |
|--------------------------------------------------|-------------|-----------------|--------------------------|-----------------|
| Anti-GAPDH                                       | Mouse       | 1/1000          | Santa Cruz Biotechnology | sc-365062       |
| Anti-beta actin                                  | Mouse       | 1/5000          | Abcam                    | ab8227          |
| Anti-MAP2                                        | Mouse       | 1/200           | Merck-Millipore          | MAB3418         |
| Anti-NESTIN                                      | Rabbit      | 1/200           | Merck-Millipore          | ABD69           |
| Anti- $\alpha$ -Synuclein ( $\alpha$ Syn)        | Mouse       | 1/500           | BD Biosciences           | 610787          |
| Anti-phosphorylated $\alpha$ -Synuclein (Ser129) | Mouse       | 1/10000         | WAKO                     | 015-25191       |
| Anti-TH                                          | Rabbit      | 1/500           | Merck-Millipore          | AB152           |
| Anti-VGLUT1                                      | Mouse       | 1/1000          | Merck-Millipore          | MAB5502         |
| Anti-TUJ1                                        | Mouse       | 1/1000          | Biologend                | 801202          |
| Anti-PAX6                                        | Mouse       | 1/100           | DSHB                     | AB 528427       |
| Anti-ki67                                        | Rabbit      | 1/400           | Abcam                    | ab15580         |
| Anti-Phospho-S6 Ribosomal Protein (Ser235/236)   | Rabbit      | 1/1000          | Cell Signalling          | 4858            |
| Anti-S6 Ribosomal Protein (5G10)                 | Rabbit      | 1/1000          | Cell Signalling          | 2217            |
| Anti-Phospho-mTOR (Ser2448) (D9C2)               | Rabbit      | 1/1000          | Cell Signalling          | 5536            |
| Anti- mTOR (7C10)                                | Rabbit      | 1/1000          | Cell Signalling          | 2983            |
| Anti-Phospho-PRAS40 (Thr246) (C77D7)             | Rabbit      | 1/1000          | Cell Signalling          | 2997            |
| Anti-PRAS40 (D23C7)                              | Rabbit      | 1/1000          | Cell Signalling          | 2691            |
| Anti-TBK1/NAK                                    | Rabbit      | 1/1000          | Cell Signalling          | 3013            |
| Anti-Phospho-TBK1/NAK (Ser172) (D52C2)           | Rabbit      | 1/1000          | Cell Signalling          | 5483            |
| Anti-Phospho-PDK1 (Ser241)                       | Rabbit      | 1/1000          | Cell Signalling          | 3061            |
| Anti-PDK1 (D37A7)                                | Rabbit      | 1/1000          | Cell Signalling          | 5662            |
