# Supplementary material for: High content screening and proteomic analysis identify a kinase inhibitor that rescues pathological phenotypes in a patient-derived model of Parkinson’s disease
Source: PubMed Central journal article supplement (PMC8837749; doi:10.1038/s41531-022-00278-y), 2022-02-11
Supplement: 41531_2022_278_MOESM2_ESM.pdf [file 41531_2022_278_MOESM2_ESM.pdf]

## Reporting Summary

Nature Portfolio wishes to improve the reproducibility of the work that we publish. This form provides structure for consistency and transparency in reporting. For further information on Nature Portfolio policies, see our [Editorial Policies](#) and the [Editorial Policy Checklist](#).

### Statistics

For all statistical analyses, confirm that the following items are present in the figure legend, table legend, main text, or Methods section.

n/a Confirmed

- |                                     |                                     |                                                                                                                                                                                                                                                            |
|-------------------------------------|-------------------------------------|------------------------------------------------------------------------------------------------------------------------------------------------------------------------------------------------------------------------------------------------------------|
| <input type="checkbox"/>            | <input checked="" type="checkbox"/> | The exact sample size ( $n$ ) for each experimental group/condition, given as a discrete number and unit of measurement                                                                                                                                    |
| <input type="checkbox"/>            | <input checked="" type="checkbox"/> | A statement on whether measurements were taken from distinct samples or whether the same sample was measured repeatedly                                                                                                                                    |
| <input type="checkbox"/>            | <input checked="" type="checkbox"/> | The statistical test(s) used AND whether they are one- or two-sided<br><i>Only common tests should be described solely by name; describe more complex techniques in the Methods section.</i>                                                               |
| <input type="checkbox"/>            | <input checked="" type="checkbox"/> | A description of all covariates tested                                                                                                                                                                                                                     |
| <input type="checkbox"/>            | <input checked="" type="checkbox"/> | A description of any assumptions or corrections, such as tests of normality and adjustment for multiple comparisons                                                                                                                                        |
| <input type="checkbox"/>            | <input checked="" type="checkbox"/> | A full description of the statistical parameters including central tendency (e.g. means) or other basic estimates (e.g. regression coefficient) AND variation (e.g. standard deviation) or associated estimates of uncertainty (e.g. confidence intervals) |
| <input type="checkbox"/>            | <input checked="" type="checkbox"/> | For null hypothesis testing, the test statistic (e.g. $F$ , $t$ , $r$ ) with confidence intervals, effect sizes, degrees of freedom and $P$ value noted<br><i>Give <math>P</math> values as exact values whenever suitable.</i>                            |
| <input checked="" type="checkbox"/> | <input type="checkbox"/>            | For Bayesian analysis, information on the choice of priors and Markov chain Monte Carlo settings                                                                                                                                                           |
| <input type="checkbox"/>            | <input checked="" type="checkbox"/> | For hierarchical and complex designs, identification of the appropriate level for tests and full reporting of outcomes                                                                                                                                     |
| <input checked="" type="checkbox"/> | <input type="checkbox"/>            | Estimates of effect sizes (e.g. Cohen's $d$ , Pearson's $r$ ), indicating how they were calculated                                                                                                                                                         |

*Our web collection on [statistics for biologists](#) contains articles on many of the points above.*

### Software and code

Policy information about [availability of computer code](#)

**Data collection** For High-Content Screening images were captured by automated confocal microscopy (Opera High-Content Screening System, Perkin Elmer, Hamburg, Germany). Confocal Images were captured using Leica TCS SP8 confocal microscope (LEICA Microsystems). The raw mass spectral files were processed using MaxQuant software (version 1.6.9.0) with default parameters for protein identification and quantification.

**Data analysis** Statistical analysis for proteomics data was performed using Perseus (1.6.6.0). Enrichment analysis for biological processes, molecular function and cellular compartment was performed using DAVID functional annotation tools. The enrichment of proteins involved in signaling pathways was performed using the Reactome pathway database. Confocal images were analyzed using ImageJ software (NIH). Statistical analysis was performed using GraphPad Prism 6 software.

For manuscripts utilizing custom algorithms or software that are central to the research but not yet described in published literature, software must be made available to editors and reviewers. We strongly encourage code deposition in a community repository (e.g. GitHub). See the Nature Portfolio [guidelines for submitting code & software](#) for further information.

### Data

Policy information about [availability of data](#)

All manuscripts must include a [data availability statement](#). This statement should provide the following information, where applicable:

- Accession codes, unique identifiers, or web links for publicly available datasets
- A description of any restrictions on data availability
- For clinical datasets or third party data, please ensure that the statement adheres to our [policy](#)

The mass spectrometry proteomics data have been deposited to the ProteomeXchange Consortium via the PRIDE partner repository with the dataset identifier PXD019574.

## Field-specific reporting

Please select the one below that is the best fit for your research. If you are not sure, read the appropriate sections before making your selection.

Life sciences  Behavioural & social sciences  Ecological, evolutionary & environmental sciences

For a reference copy of the document with all sections, see [nature.com/documents/nr-reporting-summary-flat.pdf](https://www.nature.com/documents/nr-reporting-summary-flat.pdf)

## Life sciences study design

All studies must disclose on these points even when the disclosure is negative.

|                 |                                                                                                                           |
|-----------------|---------------------------------------------------------------------------------------------------------------------------|
| Sample size     | Sample sizes were not predetermined, instead followed previous publications from our lab and others.                      |
| Data exclusions | No data was excluded.                                                                                                     |
| Replication     | All data was generated from multiple biological replicates. Additionally, the number of independent experiments is shown. |
| Randomization   | All samples were assigned treatments randomly.                                                                            |
| Blinding        | All experiments and analysis were performed randomly.                                                                     |

## Reporting for specific materials, systems and methods

We require information from authors about some types of materials, experimental systems and methods used in many studies. Here, indicate whether each material, system or method listed is relevant to your study. If you are not sure if a list item applies to your research, read the appropriate section before selecting a response.

### Materials & experimental systems

| n/a                                 | Involved in the study                                     |
|-------------------------------------|-----------------------------------------------------------|
| <input type="checkbox"/>            | <input checked="" type="checkbox"/> Antibodies            |
| <input type="checkbox"/>            | <input checked="" type="checkbox"/> Eukaryotic cell lines |
| <input checked="" type="checkbox"/> | <input type="checkbox"/> Palaeontology and archaeology    |
| <input checked="" type="checkbox"/> | <input type="checkbox"/> Animals and other organisms      |
| <input checked="" type="checkbox"/> | <input type="checkbox"/> Human research participants      |
| <input checked="" type="checkbox"/> | <input type="checkbox"/> Clinical data                    |
| <input checked="" type="checkbox"/> | <input type="checkbox"/> Dual use research of concern     |

### Methods

| n/a                                 | Involved in the study                           |
|-------------------------------------|-------------------------------------------------|
| <input checked="" type="checkbox"/> | <input type="checkbox"/> ChIP-seq               |
| <input checked="" type="checkbox"/> | <input type="checkbox"/> Flow cytometry         |
| <input checked="" type="checkbox"/> | <input type="checkbox"/> MRI-based neuroimaging |

## Antibodies

### Antibodies used

| Name                                             | Host   | Dilution | Vendor                   | Catalog#  |
|--------------------------------------------------|--------|----------|--------------------------|-----------|
| Anti-GAPDH                                       | Mouse  | 1/1000   | Santa Cruz Biotechnology | sc-365062 |
| Anti-beta actin                                  | Mouse  | 1/5000   | Abcam                    | ab8227    |
| Anti-MAP2                                        | Mouse  | 1/200    | Merck-Millipore          | MAB3418   |
| Anti-NESTIN                                      | Rabbit | 1/200    | Merck-Millipore          | ABD69     |
| Anti- $\alpha$ -Synuclein ( $\alpha$ Syn)        | Mouse  | 1/500    | BD Biosciences           | 610787    |
| Anti-phosphorylated $\alpha$ -Synuclein (Ser129) | Mouse  | 1/10000  | WAKO                     | 015-25191 |
| Anti-TH                                          | Rabbit | 1/500    | Merck-Millipore          | AB152     |
| Anti-VGLUT1                                      | Mouse  | 1/1000   | Merck-Millipore          | MAB5502   |
| Anti-TUJ1                                        | Mouse  | 1/1000   | Biolegend                | 801202    |
| Anti-PAX6                                        | Mouse  | 1/100    | DSHB                     | AB 528427 |
| Anti-ki67                                        | Rabbit | 1/400    | Abcam                    | ab15580   |
| Anti-Phospho-S6 Ribosomal Protein (Ser235/236)   | Rabbit | 1/1000   | Cell Signalling          | 4858      |
| Anti-S6 Ribosomal Protein (S610)                 | Rabbit | 1/1000   | Cell Signalling          | 2217      |
| Anti-Phospho-mTOR (Ser2448) (D9C2)               | Rabbit | 1/1000   | Cell Signalling          | 5536      |
| Anti- mTOR (7C10)                                | Rabbit | 1/1000   | Cell Signalling          | 2983      |
| Anti-Phospho-PRAS40 (Thr246) (C77D7)             | Rabbit | 1/1000   | Cell Signalling          | 2997      |
| Anti-PRAS40 (D23C7)                              | Rabbit | 1/1000   | Cell Signalling          | 2691      |
| Anti-TBK1/NAK                                    | Rabbit | 1/1000   | Cell Signalling          | 3013      |
| Anti-Phospho-TBK1/NAK (Ser172) (D52C2)           | Rabbit | 1/1000   | Cell Signalling          | 5483      |
| Anti-Phospho-PDK1 (Ser241)                       | Rabbit | 1/1000   | Cell Signalling          | 3061      |
| Anti-PDK1 (D37A7)                                | Rabbit | 1/1000   | Cell Signalling          | 5662      |

Validation

All antibodies were independently validated by the vendors (Merk-Millipore, BD Biosciences, Bilogend, DSHB, Abcam, Cell Signaling, Santa-Cruz, websites and product pages).

## Eukaryotic cell lines

---

Policy information about [cell lines](#)

Cell line source(s)

p.A53T patient-derived and control iPSC lines (Kouroupi et al PNAS 2017), iCell DopaNeurons 01279, Catalog No C1028, and a heterozygous (HZ) A53T allelic variant isogenic to iCell DopaNeurons, PD SNCA A53T HZ 01279, Catalog No C1113 were commercially available (Fujifilm Cellular Dynamics International). SH-SY5Y cell line was generously provided by Dr. Leonidas Stefanis.

Authentication

None of the cell lines used were authenticated.

Mycoplasma contamination

All cell lines were negative for mycoplasma contamination.

Commonly misidentified lines  
(See [ICLAC](#) register)

N/A
